# Supplementary material for: High-Throughput Sequencing and Degradome Analysis Identify miRNAs and Their Targets Involved in Fruit Senescence of Fragaria ananassa
Source: PLoS One. 2013 Aug 19;8(8):e70959. doi: 10.1371/journal.pone.0070959 (PMC3747199; doi:10.1371/journal.pone.0070959)
Supplement: Table S1 — Profile of known microRNAs originating from pre-miRNAs that cannot be mapped to Fragaria vesca genome, but the microRNAs were mapped to the genome and the extended sequences at the mapped positions of the genome potentially form hairpins. (XLS) [file pone.0070959.s001.xls]

## Sheet: Sheet1
Table S1.Profile of known microRNAs originating from pre-miRNAs that cannot be mapped to Fragaria vesca genome, but the novel microRNAs were mapped to the genome and the extended sequences at the mapped positions of the genome potentially form hairpins.
pre-miRNA_Index	type	miRNA_Index	miR_seq	miR_name	group	genomeID	strand	start	end	type	genome_seq	raw_A1	raw_A2	raw_A3	raw_A4	norm_A1	norm_A2	norm_A3	norm_A4	miRNA_Index	miR_name	miR_seq	len	#copy of the miRNA	score(all) of the miRNA	score(mapped) of the miRNA	#error of the miRNA	group	#mir	mirIDs,	rep_mirID	rep_mirSeq	rep_miRID	rep_miRSeq	#reads(all for cluster)	#reads(all)	#reads(0err)	#reads(>0err)	score(all)	score(0err)	score(>0err)	score(mapped)	score(mapped,0err)	score(mapped,>0err)	#base_inLoop	flag	SS	#maxError(a spot in mature region)	#maxBiasedError (in mature region)
1	5'	1	TGCGGCATCATCAAGATTCAC	aly-miR172a-5p_L+1R-1_1ss3TC	gp2a	scf0513101	+	226566	226826	5'	actagtcagttcttggtggTGCGGCATCATCAAGATTCACatacttttaaccgaaaggttcatgccattgaagtaagtactGAGAATCTTGATGATGCTGCAtcagctagtacatgactcta	29	24	45	29	27	32	43	25	61	aly-miR172a-5p_L+1R-1_1ss3TC	TGCGGCATCATCAAGATTCAC	21	40	787	787	0	gp2a	108	mdm-MIR172e,mdm-MIR172b,mdm-MIR172d,mdm-MIR172c,mdm-MIR172a,mdm-MIR172g,mdm-MIR172i,mdm-MIR172l,csi-MIR172a,csi-MIR172b,csi-MIR172c,ptc-MIR172b,ptc-MIR172f,ptc-MIR172a,ptc-MIR172d,ptc-MIR172c,ptc-MIR172e,ptc-MIR172g,ptc-MIR172h,nta-MIR172g,nta-MIR172d,nta-MIR172h,nta-MIR172e,nta-MIR172f,nta-MIR172i,nta-MIR172c,nta-MIR172a,nta-MIR172j,nta-MIR172b,sly-MIR172b,sly-MIR172a,vvi-MIR172d,vvi-MIR172c,vvi…	aly-MIR172a	ggagccacggtcgctgtttgctgctGTGGCATCATCAAGATTCACAtctgttgatggacggtggtgattcgctctccccaaagttctctatgaaaatgAGAATCTTGATGATGCTGCATcggcaatcaacggctattctttttctctcc	aly-miR172a-5p	GTGGCATCATCAAGATTCACA	811	127	110	17	97100	84266	12834	96472	84266	12206	0	y	...(((((....((((((((((((((((((((((((((.(((((((...(((....)))(((......)))...))))).)).)))))))))))))))))))))).))))....)))))...	2	0
1	3'	2	GAGAATCTTGATGATGCTGCA	mdm-miR172g_L+1	gp2a	scf0513101	+	226566	226826	3'	actagtcagttcttggtggTGCGGCATCATCAAGATTCACatacttttaaccgaaaggttcatgccattgaagtaagtactGAGAATCTTGATGATGCTGCAtcagctagtacatgactcta	84	79	92	88	77	105	89	74	79	mdm-miR172a_L+1	GAGAATCTTGATGATGCTGCA	21	267	774	774	0	gp2a	108	mdm-MIR172e,mdm-MIR172b,mdm-MIR172d,mdm-MIR172c,mdm-MIR172a,mdm-MIR172g,mdm-MIR172i,mdm-MIR172l,csi-MIR172a,csi-MIR172b,csi-MIR172c,ptc-MIR172b,ptc-MIR172f,ptc-MIR172a,ptc-MIR172d,ptc-MIR172c,ptc-MIR172e,ptc-MIR172g,ptc-MIR172h,nta-MIR172g,nta-MIR172d,nta-MIR172h,nta-MIR172e,nta-MIR172f,nta-MIR172i,nta-MIR172c,nta-MIR172a,nta-MIR172j,nta-MIR172b,sly-MIR172b,sly-MIR172a,vvi-MIR172d,vvi-MIR172c,vvi…	mdm-MIR172g	gtcgttgtttgcgggtgtggcatcatcaagattcacacatgcaattaactgataaagttgtttgaaagtgAGAATCTTGATGATGCTGCAtcggcaataaaccac	mdm-miR172a	AGAATCTTGATGATGCTGCA	811	342	151	191	261520	116210	145310	256180	116210	139970	0	y	...(((((....((((((((((((((((((((((((((.(((((((...(((....)))(((......)))...))))).)).)))))))))))))))))))))).))))....)))))...	2	0
2	5'	3	GTGGTATCAGGGCTATGTTA	mdm-MIR1511-p5_1ss12AG	gp2a	scf0513098	-	1204964	1205223	5'	agggcaacattggtgttgattcaaacaaGTGGTATCAGGGCTATGTTAaactaggatgcatcttgatctggttgcttcaagtctgACCTAGCTCTGATACCATGTgttactgacttcaccatggaaatttttgcatg	11	1	12	14	10	1	12	12	127	mdm-MIR1511-p5_1ss12AG	GTGGTATCAGGGCTATGTTA	20	10	740	740	0	gp2a	7	mdm-MIR1511,rgl-MIR5139,aly-MIR829,pab-MIR1863,osa-MIR1873,osa-MIR1863b,osa-MIR1863c,	mdm-MIR1511	gtgggtctagttctcattccattgtggtatcaggactatgttatgtgaatgttgttacacaatattgtgttactcatctgtataACCTAGCTCTGATACCATGAAcaaaattaaatctacgacccat	mdm-MIR1511-p5	gtggtatcaggactatgtta	2512	38	28	10	26594	19548	7046	26378	19548	6830	0	y	...((((((.(((((.....(((((((..((((((((((((((.((((.(((.(((.(((.((......)).)))))).))).)))).))))))))))))))..))))..)))...))))))).......))))...	2	0
2	3'	4	ACCTAGCTCTGATACCATGT	mdm-miR1511_R-1_1ss20AT	gp2a	scf0513098	-	1204964	1205223	3'	agggcaacattggtgttgattcaaacaaGTGGTATCAGGGCTATGTTAaactaggatgcatcttgatctggttgcttcaagtctgACCTAGCTCTGATACCATGTgttactgacttcaccatggaaatttttgcatg	653	434	736	651	599	579	711	551	98	mdm-miR1511_R-1_1ss20AT	ACCTAGCTCTGATACCATGT	20	1885	741	741	0	gp2a	7	mdm-MIR1511,rgl-MIR5139,aly-MIR829,pab-MIR1863,osa-MIR1873,osa-MIR1863b,osa-MIR1863c,	mdm-MIR1511	gtgggtctagttctcattccattgtggtatcaggactatgttatgtgaatgttgttacacaatattgtgttactcatctgtataACCTAGCTCTGATACCATGAAcaaaattaaatctacgacccat	mdm-miR1511	ACCTAGCTCTGATACCATGAA	2512	2474	2276	198	1806256	1657178	149078	1799516	1657178	142338	0	y	...((((((.(((((.....(((((((..((((((((((((((.((((.(((.(((.(((.((......)).)))))).))).)))).))))))))))))))..))))..)))...))))))).......))))...	2	0
3	5'	5	CAGGGACGAGGTAGAGCATGG	mdm-miR408b_L-1R+1_1ss8AC	gp2a	scf0513030	-	413193	413453	5'	attactagttcatcttaggggtgagaactgagaggattgaaagagagtgatgataaataagaCAGGGACGAGGTAGAGCATGGatggagttcccaacagaacagtcaagctgttgtggctccactcATGCACTGCCTCTTCCCTGGCtttgactcctctggattttcttaacctcttttacgtactcatcccattagtttt	4255	2450	3633	5727	3900	3268	3508	4846	131	mdm-miR408b_L-1R+1_1ss8AC	CAGGGACGAGGTAGAGCATGG	21	7657	772	772	0	gp2a	39	mdm-MIR408a,mdm-MIR408c,mdm-MIR408b,csi-MIR408,ptc-MIR408,nta-MIR408,vvi-MIR408,vun-MIR408,dpr-MIR408,mtr-MIR408,gma-MIR408b,gma-MIR408d,gma-MIR408c,gma-MIR408a,ahy-MIR408,rco-MIR408,cme-MIR408,hbr-MIR408b,hbr-MIR408a,mes-MIR408,ath-MIR408,aly-MIR408,smo-MIR408,cca-MIR408,ppt-MIR408b,pta-MIR408,bdi-MIR408,osa-MIR408,sof-MIR408c,sof-MIR408b,sof-MIR408a,sof-MIR408d,sof-MIR408e,ssp-MIR408a,ssp-MIR40…	mdm-MIR408b	ACAGGGAAGAGGTAGAGCATGgatggagttctcaagagcaaaatagagctcttgtgactctactcatgcactgcctcttccctgg	mdm-miR408b	ACAGGGAAGAGGTAGAGCATG	20022	16065	15615	450	12380809	12048577	332232	12368269	12048577	319692	0	y	...((((((........((((((((.((.((((((...(((((((((.((........(((.((((((.(((((((.(((((..(((((..((((((((..........)))))).)))))))..))))).))))))).)))))).)))....))))))...)))))....))))))....)).))))))))))))))...	2	0
3	3'	6	ATGCACTGCCTCTTCCCTGGC	mdm-miR408b	gp2a	scf0513030	-	413193	413453	3'	attactagttcatcttaggggtgagaactgagaggattgaaagagagtgatgataaataagaCAGGGACGAGGTAGAGCATGGatggagttcccaacagaacagtcaagctgttgtggctccactcATGCACTGCCTCTTCCCTGGCtttgactcctctggattttcttaacctcttttacgtactcatcccattagtttt	1108	653	1030	1166	1016	871	994	987	124	mdm-miR408a	ATGCACTGCCTCTTCCCTGGC	21	2613	778	778	0	gp2a	39	mdm-MIR408a,mdm-MIR408c,mdm-MIR408b,csi-MIR408,ptc-MIR408,nta-MIR408,vvi-MIR408,vun-MIR408,dpr-MIR408,mtr-MIR408,gma-MIR408b,gma-MIR408d,gma-MIR408c,gma-MIR408a,ahy-MIR408,rco-MIR408,cme-MIR408,hbr-MIR408b,hbr-MIR408a,mes-MIR408,ath-MIR408,aly-MIR408,smo-MIR408,cca-MIR408,ppt-MIR408b,pta-MIR408,bdi-MIR408,osa-MIR408,sof-MIR408c,sof-MIR408b,sof-MIR408a,sof-MIR408d,sof-MIR408e,ssp-MIR408a,ssp-MIR40…	mdm-MIR408a	ggaaagagagttaataagACAGGGAAGAGGTAGAGCATGgatggagttctcaagagcaaaatagagctcttgtgactctactcATGCACTGCCTCTTCCCTGGCtttgcctccctctccttcc	mdm-miR408a	ATGCACTGCCTCTTCCCTGGC	20022	3957	3386	571	3110329	2645248	465081	3089153	2645248	443905	0	y	...((((((........((((((((.((.((((((...(((((((((.((........(((.((((((.(((((((.(((((..(((((..((((((((..........)))))).)))))))..))))).))))))).)))))).)))....))))))...)))))....))))))....)).))))))))))))))...	2	0
4	5'	7	TTCCACAGCTTTCTTGAACTT	mdm-miR396e	gp2a	scf0513105	-	1071378	1071638	5'	ctagaagaaaactgtgtgtaattctcaagtcctggtcatgcttTTCCACAGCTTTCTTGAACTTcaattctctgctaacaatctgtaatctcttgcaagagtattagcacaatgtttgggagCTCAAGAAAGCTGTGGGACAacatgacaacccaggatttttccacccctttcttcatt	154	52	162	244	141	69	156	206	129	mdm-miR396c	TTCCACAGCTTTCTTGAACTT	21	1031	782	782	0	gp2a	94	mdm-MIR396c,mdm-MIR396d,mdm-MIR396e,mdm-MIR396b,mdm-MIR396a,mdm-MIR396g,mdm-MIR396f,ccl-MIR396,csi-MIR396c,csi-MIR396a,csi-MIR396b,ptc-MIR396d,ptc-MIR396c,ptc-MIR396e,ptc-MIR396b,ptc-MIR396a,ptc-MIR396f,ptc-MIR396g,nta-MIR396c,nta-MIR396b,nta-MIR396a,vvi-MIR396b,vvi-MIR396d,vvi-MIR396c,vvi-MIR396a,bgy-MIR396b,bgy-MIR396a,bcy-MIR396a,aqc-MIR396b,aqc-MIR396a,tcc-MIR396c,tcc-MIR396e,tcc-MIR396b,tcc-…	mdm-MIR396e	ttgccatgcttTTCCACAGCTTTCTTGAACTTcaattctctgctgtctaaatktctttcaggactagcaccatggaagctcaagaaagctgtgggagaccatggcaa	mdm-miR396c	TTCCACAGCTTTCTTGAACTT	1613	611	523	88	475200	408993	66206.5	472030	408993	63036.5	0	y	...(((((((.....(((.((.....((((((((((((((...(((((((((((((((((.((((.......((((((...(((((((....)))).)))...)))))).........)))).)))))))))))))))))...)))))....))))))))))).)))...)))))))...	2	0
4	3'	8	CTCAAGAAAGCTGTGGGACA	ptc-miR396e-3p_1ss19GC	gp2a	scf0513105	-	1071378	1071638	3'	ctagaagaaaactgtgtgtaattctcaagtcctggtcatgcttTTCCACAGCTTTCTTGAACTTcaattctctgctaacaatctgtaatctcttgcaagagtattagcacaatgtttgggagCTCAAGAAAGCTGTGGGACAacatgacaacccaggatttttccacccctttcttcatt	85	114	99	129	78	152	96	109	121	ptc-miR396e-3p_1ss19GC	CTCAAGAAAGCTGTGGGACA	20	275	745	745	0	gp2a	94	mdm-MIR396c,mdm-MIR396d,mdm-MIR396e,mdm-MIR396b,mdm-MIR396a,mdm-MIR396g,mdm-MIR396f,ccl-MIR396,csi-MIR396c,csi-MIR396a,csi-MIR396b,ptc-MIR396d,ptc-MIR396c,ptc-MIR396e,ptc-MIR396b,ptc-MIR396a,ptc-MIR396f,ptc-MIR396g,nta-MIR396c,nta-MIR396b,nta-MIR396a,vvi-MIR396b,vvi-MIR396d,vvi-MIR396c,vvi-MIR396a,bgy-MIR396b,bgy-MIR396a,bcy-MIR396a,aqc-MIR396b,aqc-MIR396a,tcc-MIR396c,tcc-MIR396e,tcc-MIR396b,tcc-…	ptc-MIR396e	ggtcatgcttTTCCACAGCTTTCTTGAACTTctttgccttgcttaatctgtgtatatatagatcactacatgtacagctcctatatatataaatatatgtatgtatagcgccatggaagCTCAAGAAAGCTGTGGGAGAacatgg	ptc-miR396e-3p	CTCAAGAAAGCTGTGGGAGA	1613	427	413	14	320543	309860	10683	320040	309860	10180	0	y	...(((((((.....(((.((.....((((((((((((((...(((((((((((((((((.((((.......((((((...(((((((....)))).)))...)))))).........)))).)))))))))))))))))...)))))....))))))))))).)))...)))))))...	2	0
5	5'	9	AGGTATTGGCGCGTCTCAATT	gma-MIR171t-p5_1ss14CT	gp2a	scf0512991	-	466609	466869	5'	gaAGGTATTGGCGCGTCTCAATTtgaagacacggctatgtaggcttagtcttgtgttttgaTTGAGCCGCGTCAATATCTCCt	13	7	16	26	12	9	15	22	42	gma-MIR171t-p5_1ss14CT	AGGTATTGGCGCGTCTCAATT	21	51	769	769	0	gp2a	15	mdm-MIR171b,mdm-MIR171a,ctr-MIR171,vvi-MIR171b,mtr-MIR171b,gma-MIR171m,gma-MIR171t,gma-MIR171p,gma-MIR171n,cme-MIR171h,mes-MIR171,osa-MIR171i,sbi-MIR171h,zma-MIR171m,zma-MIR171l,	gma-MIR171t	gaagtgctgtatgaagcacaaatcaaggtattggcgcgcctcaatttgaagtcatggttaacatgaaacaagccatgtagttttaaTTGAGCCGCGTCAATATCTCAtcttgcactt	gma-MIR171t-p5	aggtattggcgcgcctcaatt	909	62	61	1	47861	46980	881	47824	46980	844	0	y	..(((((((((((((.(((((((..((.(((.(((((........))))).))).))..))))))).)))))))))))))...	2	0
5	3'	10	TTGAGCCGCGTCAATATCTCC	mdm-miR171a	gp2a	scf0512991	-	466609	466869	3'	gaAGGTATTGGCGCGTCTCAATTtgaagacacggctatgtaggcttagtcttgtgttttgaTTGAGCCGCGTCAATATCTCCt	257	129	234	227	236	172	225	192	97	mdm-miR171a	TTGAGCCGCGTCAATATCTCC	21	818	769	769	0	gp2a	15	mdm-MIR171b,mdm-MIR171a,ctr-MIR171,vvi-MIR171b,mtr-MIR171b,gma-MIR171m,gma-MIR171t,gma-MIR171p,gma-MIR171n,cme-MIR171h,mes-MIR171,osa-MIR171i,sbi-MIR171h,zma-MIR171m,zma-MIR171l,	mdm-MIR171a	gaaggtattgacgcgcctcaatttgaacgrgtggctyatattggagacttaaccatgcgattctgaTTGAGCCGCGTCAATATCTCC	mdm-miR171a	TTGAGCCGCGTCAATATCTCC	909	846.5	825.5	21	650033	634270	15763	649537	634270	15267	0	y	..(((((((((((((.(((((((..((.(((.(((((........))))).))).))..))))))).)))))))))))))...	2	0
6	5'	11	TGTGATATTGGGTCGGCTCATC	csi-miR479_1ss12TG	gp2a	scf0513190	+	976551	976811	5'	gcagaagcagacatggTGTGATATTGAGTCGGCTCATCaatcaatcccagtcatattcgtgttcaaactgatgatcacgttaataatatgatttctgagaCGAGCCGAACCAATATCACTCttgtattcttcttt	4	13	17	15	4	17	16	13	59	csi-miR479_1ss12TG	TGTGATATTGGGTCGGCTCATC	22	49	807	770	1	gp2a	12	csi-MIR479,csi-MIR171b,ptc-MIR479,ptc-MIR171n,ptc-MIR171m,ptc-MIR171l,vvi-MIR479,ghr-MIR479,mtr-MIR171i,mtr-MIR171h,gma-MIR171b,gma-MIR171h,	csi-MIR171b	caggcagagaaagcacttcttggcgattggagaagtagacatggTGTGATATTGGTTCGGCTCATCttaattaatagattcatatttcagcccttaaggttcttacatgtatatatctagaCGAGCCGAATCAATATCACTCttgtatgcttctttcttttgatt	csi-miR479	TGTGATATTGGTTCGGCTCATC	149	49	0	49	39543	0	39543	37730	0	37730	0	y	..(((((...(((.((.(((((((((..(((((((.((..(((.....(((((((((((((.(((......))).)))).....)))))))))..))))).)))))))..))))))))).)))))...)))))..	4	0
6	3'	12	CGAGCCGAACCAATATCACTC	csi-miR171b_1ss10TC	gp2a	scf0513190	+	976551	976811	3'	gcagaagcagacatggTGTGATATTGAGTCGGCTCATCaatcaatcccagtcatattcgtgttcaaactgatgatcacgttaataatatgatttctgagaCGAGCCGAACCAATATCACTCttgtattcttcttt	21	21	37	21	19	28	36	18	125	csi-miR171b_1ss10TC	CGAGCCGAACCAATATCACTC	21	92	784	784	0	gp2a	12	csi-MIR479,csi-MIR171b,ptc-MIR479,ptc-MIR171n,ptc-MIR171m,ptc-MIR171l,vvi-MIR479,ghr-MIR479,mtr-MIR171i,mtr-MIR171h,gma-MIR171b,gma-MIR171h,	csi-MIR171b	caggcagagaaagcacttcttggcgattggagaagtagacatggTGTGATATTGGTTCGGCTCATCttaattaatagattcatatttcagcccttaaggttcttacatgtatatatctagaCGAGCCGAATCAATATCACTCttgtatgcttctttcttttgatt	csi-miR171b	CGAGCCGAATCAATATCACTC	149	100	93	7	78484	72845	5639	78215	72845	5370	0	y	..(((((...(((.((.(((((((((..(((((((.((..(((.....(((((((((((((.(((......))).)))).....)))))))))..))))).)))))))..))))))))).)))))...)))))..	4	0
7	5'	13	TGAAGCTGCCAGCATGATCTG	mdm-miR167g_1ss21AG	gp2a	scf0513168	+	2505727	2505987	5'	gttgttatggtgcacctccaatagtTGAAGCTGCCAGCATGATCTAaactcttctttatacaagaaagACTGGATCATGTGGTAGCTTCacctgtttgatggaagcaccagaaaccat	25764	10529	34846	37618	23615	14042	33645	31832	66	mdm-miR167b_1ss21AG	TGAAGCTGCCAGCATGATCTG	21	105101	784	745	1	gp2a	84	mdm-MIR167f,mdm-MIR167g,mdm-MIR167j,mdm-MIR167a,ccl-MIR167b,ccl-MIR167a,csi-MIR167a,csi-MIR167b,csi-MIR167c,ptc-MIR167b,ptc-MIR167d,ptc-MIR167f,ptc-MIR167g,ptc-MIR167e,ptc-MIR167c,ptc-MIR167h,nta-MIR167e,nta-MIR167c,nta-MIR167a,nta-MIR167b,nta-MIR167d,vvi-MIR167b,vvi-MIR167c,vvi-MIR167a,aqc-MIR167,tcc-MIR167b,tcc-MIR167c,tcc-MIR167a,ghr-MIR167a,dpr-MIR167b,dpr-MIR167c,mtr-MIR167b,lja-MIR167,gso-M…	mdm-MIR167g	agaatgacctagctagagtgcttgctatcttatcgtgcacctccaacagtTGAAGCTGCCAGCATGATCTAagctatctttgtatacaggaaaggctatagatcatgtggtagcttcacctgttgaatgaagcacgagaaaaaccctagattcacagcggtcgatct	mdm-miR167b	TGAAGCTGCCAGCATGATCTA	110483	108757	11.5	108746	8.53188e+07	9140.5	85309684	81076197	9140.5	8.10671e+07	0	y	(((....((((((.((((.(((((.(((((((((((.(((((((((..((.(((((.....)))))))..)))))))))))))))))))).))))).)).))..))))))..)))...	1	1
7	3'	14	ACTGGATCATGTGGTAGCTTC	tcc-MIR167a-p3_1ss2TC	gp2a	scf0513168	+	2505727	2505987	3'	gttgttatggtgcacctccaatagtTGAAGCTGCCAGCATGATCTAaactcttctttatacaagaaagACTGGATCATGTGGTAGCTTCacctgtttgatggaagcaccagaaaccat	19	4	13	10	17	5	13	8	102	tcc-MIR167a-p3_1ss2TC	ACTGGATCATGTGGTAGCTTC	21	19	786	786	0	gp2a	84	mdm-MIR167f,mdm-MIR167g,mdm-MIR167j,mdm-MIR167a,ccl-MIR167b,ccl-MIR167a,csi-MIR167a,csi-MIR167b,csi-MIR167c,ptc-MIR167b,ptc-MIR167d,ptc-MIR167f,ptc-MIR167g,ptc-MIR167e,ptc-MIR167c,ptc-MIR167h,nta-MIR167e,nta-MIR167c,nta-MIR167a,nta-MIR167b,nta-MIR167d,vvi-MIR167b,vvi-MIR167c,vvi-MIR167a,aqc-MIR167,tcc-MIR167b,tcc-MIR167c,tcc-MIR167a,ghr-MIR167a,dpr-MIR167b,dpr-MIR167c,mtr-MIR167b,lja-MIR167,gso-M…	tcc-MIR167a	gccgtgcacccactagcagtTGAAGCTGCCAGCATGATCTAaacttccttctctgtcgagaggatagattggatcatgtggtagcttcacctgttgttgggatcacgaaga	tcc-MIR167a-p3	attggatcatgtggtagcttc	110483	46	40	6	35387	31009	4378	35191	31009	4182	0	y	(((....((((((.((((.(((((.(((((((((((.(((((((((..((.(((((.....)))))))..)))))))))))))))))))).))))).)).))..))))))..)))...	1	1
8	5'	15	TAGCCAAGGATGACTTGCCTG	mdm-miR169b_R-1_1ss14TC	gp2a	scf0513160	+	1619652	1619912	5'	taaagagcttgttttgTAGCCAAGGATGACTTGCCTGcagcctcccaaggggtctcgaaatatttatatgatactaacataggtatcagaagcgatccttatgtggtatacAGGCAGTCTCCTTGGCTATCatgacaggctcttctctctcatg	34	11	37	31	31	15	36	26	80	mdm-miR169b_R-1_1ss14TC	TAGCCAAGGATGACTTGCCTG	21	86	772	772	0	gp2a	88	mdm-MIR169f,mdm-MIR169e,mdm-MIR169b,mdm-MIR169c,ptc-MIR169i,ptc-MIR169m,ptc-MIR169k,ptc-MIR169j,ptc-MIR169l,ptc-MIR169r,ptc-MIR169ac,ptc-MIR169q,ptc-MIR169x,ptc-MIR169w,ptc-MIR169v,nta-MIR169t,sly-MIR169b,sly-MIR169d,vvi-MIR169e,vvi-MIR169x,aqc-MIR169b,aqc-MIR169a,tcc-MIR169j,tcc-MIR169h,tcc-MIR169d,ghr-MIR169,ghb-MIR169a,ssl-MIR169,cme-MIR169n,cme-MIR169e,bna-MIR169i,bna-MIR169k,bna-MIR169l,bna-…	mdm-MIR169b	ggaagagatgtcaaacatggaagaaggagccttgtttggTAGCCAAGGATGATTTGCCTGCagcctcgatcctaaagagtaaagaggtttattacacgataaaaatcagaaaaaccctagttgagttctcaggcagtcacgccttggcgacgtgacaagctcttctctctcatgctaggctgctctcttcc	mdm-miR169b	TAGCCAAGGATGATTTGCCTGC	253	113	111	2	86750	85050	1700	86668	85050	1618	0	y	..((((((((((..((((((((((((.((((.(((((..(((((....))))).................((((((.((((((.(((......))).)))))))))))).))))))))))))))))))).))..))))))))))..........	1	1
8	3'	16	AGGCAGTCTCCTTGGCTATC	aly-miR169k-3p_L+1	gp2a	scf0513160	+	1619652	1619912	3'	taaagagcttgttttgTAGCCAAGGATGACTTGCCTGcagcctcccaaggggtctcgaaatatttatatgatactaacataggtatcagaagcgatccttatgtggtatacAGGCAGTCTCCTTGGCTATCatgacaggctcttctctctcatg	49	24	26	36	45	32	25	30	114	aly-miR169j-3p_L+1	AGGCAGTCTCCTTGGCTATC	20	66	739	739	0	gp2a	88	mdm-MIR169f,mdm-MIR169e,mdm-MIR169b,mdm-MIR169c,ptc-MIR169i,ptc-MIR169m,ptc-MIR169k,ptc-MIR169j,ptc-MIR169l,ptc-MIR169r,ptc-MIR169ac,ptc-MIR169q,ptc-MIR169x,ptc-MIR169w,ptc-MIR169v,nta-MIR169t,sly-MIR169b,sly-MIR169d,vvi-MIR169e,vvi-MIR169x,aqc-MIR169b,aqc-MIR169a,tcc-MIR169j,tcc-MIR169h,tcc-MIR169d,ghr-MIR169,ghb-MIR169a,ssl-MIR169,cme-MIR169n,cme-MIR169e,bna-MIR169i,bna-MIR169k,bna-MIR169l,bna-…	aly-MIR169k	gaaggagatgtcaaagatgaataagagaaccacatttggTAGCCAAGGATGACTTGCCTGtttctttgaacaaaatggttggtgtcatgtttgatgtgactacaagttatatcaagaatgacattttgcttataaaaagacatcaGGCAGTCTCCTTGGCTATCcttatatgttcttctttctcatctcagacatttaccttc	aly-miR169j-3p	GGCAGTCTCCTTGGCTATC	253	135	126	9	97574	91067	6507	97221	91067	6154	0	y	..((((((((((..((((((((((((.((((.(((((..(((((....))))).................((((((.((((((.(((......))).)))))))))))).))))))))))))))))))).))..))))))))))..........	1	1
9	5'	17	TCGCTTGGTGCAGGTCGGGAA	mdm-miR168b	gp2a	scf0513122	-	170051	170311	5'	tagttactggcgggtctctaatTCGCTTGGTGCAGGTCGGGAActgcttcggttttagagagagagccagatggctgcggttccagcggagcgggtCCCGCCTTGCATCAACTGAATcggagaccgcggtgaaat	36235	21028	32890	58778	33213	28045	31756	49738	34	mdm-miR168a	TCGCTTGGTGCAGGTCGGGAA	21	122726	773	773	0	gp2a	39	mdm-MIR168a,mdm-MIR168b,ccl-MIR168,crt-MIR168,ptc-MIR168a,ptc-MIR168b,nta-MIR168d,nta-MIR168a,nta-MIR168b,nta-MIR168e,nta-MIR168c,vvi-MIR168,tcc-MIR168,vun-MIR168,mtr-MIR168c,mtr-MIR168b,mtr-MIR168a,gma-MIR168b,gma-MIR168a,rco-MIR168,cme-MIR168,mes-MIR168,bna-MIR168a,bna-MIR168b,ath-MIR168a,ath-MIR168b,aly-MIR168a,aly-MIR168b,cca-MIR168a,bdi-MIR168,hvu-MIR168,osa-MIR168b,osa-MIR168a,sof-MIR168a,s…	mdm-MIR168b	gtaggaggcgtagggcacgatgattcatttcctggcggtctctaatTCGCTTGGTGCAGGTCGGGAAccgcttcgycccgtttgagcctataaaccagctggctcgaggctgcggggcgaaacggrtcccgccttgcatcaactgaatcggagaccgcggtgaaggcggtttcatggatcttgcgttcctgc	mdm-miR168a	TCGCTTGGTGCAGGTCGGGAA	153365	148931	141619	7312	115500306	109952200	5548106	115268641	109952200	5316441	0	y	...(((((.((.((((((..((((..((((((((((.(((((.((((((((......(((....((((....))))....)))...)))))))).))))).))))))))))..))))..)))))))))))))...	4	0
9	3'	18	CCCGCCTTGCATCAACTGAAT	ptc-miR168b-3p	gp2a	scf0513122	-	170051	170311	3'	tagttactggcgggtctctaatTCGCTTGGTGCAGGTCGGGAActgcttcggttttagagagagagccagatggctgcggttccagcggagcgggtCCCGCCTTGCATCAACTGAATcggagaccgcggtgaaat	1051	872	994	1517	963	1163	960	1284	63	ptc-miR168a-3p	CCCGCCTTGCATCAACTGAAT	21	3463	778	778	0	gp2a	39	mdm-MIR168a,mdm-MIR168b,ccl-MIR168,crt-MIR168,ptc-MIR168a,ptc-MIR168b,nta-MIR168d,nta-MIR168a,nta-MIR168b,nta-MIR168e,nta-MIR168c,vvi-MIR168,tcc-MIR168,vun-MIR168,mtr-MIR168c,mtr-MIR168b,mtr-MIR168a,gma-MIR168b,gma-MIR168a,rco-MIR168,cme-MIR168,mes-MIR168,bna-MIR168a,bna-MIR168b,ath-MIR168a,ath-MIR168b,aly-MIR168a,aly-MIR168b,cca-MIR168a,bdi-MIR168,hvu-MIR168,osa-MIR168b,osa-MIR168a,sof-MIR168a,s…	ptc-MIR168b	ggtctctaatTCGCTTGGTGCAGGTCGGGAActgattcggcgatttgattgccagatggctaaacacgattggctgtgaggcaaattataaaaagaaagagaattggatCCCGCCTTGCATCAACTGAATcggaga	ptc-miR168a-3p	CCCGCCTTGCATCAACTGAAT	153365	4434	4026	408	3462420	3135822	326598	3447659	3135822	311837	0	y	...(((((.((.((((((..((((..((((((((((.(((((.((((((((......(((....((((....))))....)))...)))))))).))))).))))))))))..))))..)))))))))))))...	4	0
10	5'	19	GGAGCATCTTCAAGATTCACA	ptc-miR172h-5p_2ss7CT9AT	gp2a	scf0513113	-	236956	237216	5'	tccagtcagtgtttgcgggtGGAGCATCTTCAAGATTCACAatctttaggggcggcttaagcttaactttgttgataaagccaggcccttaagttagatttgGGAATCTTGATGATGCTGCAGcggcaaataaacgactatt	12	8	14	13	11	11	14	11	58	ptc-miR172h-5p_2ss7CT9AT	GGAGCATCTTCAAGATTCACA	21	22	785	785	0	gp2a	102	mdm-MIR172l,mdm-MIR172b,mdm-MIR172c,mdm-MIR172a,mdm-MIR172i,mdm-MIR172e,mdm-MIR172d,mdm-MIR172g,csi-MIR172c,ptc-MIR172h,ptc-MIR172g,ptc-MIR172d,ptc-MIR172e,ptc-MIR172b,ptc-MIR172f,ptc-MIR172a,ptc-MIR172c,nta-MIR172j,nta-MIR172h,nta-MIR172e,nta-MIR172g,nta-MIR172f,nta-MIR172i,nta-MIR172c,nta-MIR172d,nta-MIR172a,sly-MIR172b,sly-MIR172a,vvi-MIR172c,vvi-MIR172d,aqc-MIR172b,aqc-MIR172a,tcc-MIR172a,tcc…	ptc-MIR172h	ctgtttgccgatGGAGCACCATCAAGATTCACAaactttattagggctaataagtggtgatgatggtggcttttggtggtcccttcgtttcaacccaatagccatttgaattgGGAATCTTGATGATGCTGCAGcggcaataa	ptc-miR172h-5p	GGAGCACCATCAAGATTCACA	380	47	43	4	35848	32999	2849	35726	32999	2727	0	n	...((((..(((((((...((.((((((.(((((((((..((((((((((((((((((....(((((...)))))..)))))..))))))))...)))))...))))))))).)))))).))...)))))))...))))...	5	1
10	3'	20	GGAATCTTGATGATGCTGCAT	mdm-miR172l_1ss21GT	gp2a	scf0513113	-	236956	237216	3'	tccagtcagtgtttgcgggtGGAGCATCTTCAAGATTCACAatctttaggggcggcttaagcttaactttgttgataaagccaggcccttaagttagatttgGGAATCTTGATGATGCTGCAGcggcaaataaacgactatt	52	25	61	67	47	33	59	57	136	mdm-miR172l_1ss21GT	GGAATCTTGATGATGCTGCAT	21	171	778	738	1	gp2a	102	mdm-MIR172l,mdm-MIR172b,mdm-MIR172c,mdm-MIR172a,mdm-MIR172i,mdm-MIR172e,mdm-MIR172d,mdm-MIR172g,csi-MIR172c,ptc-MIR172h,ptc-MIR172g,ptc-MIR172d,ptc-MIR172e,ptc-MIR172b,ptc-MIR172f,ptc-MIR172a,ptc-MIR172c,nta-MIR172j,nta-MIR172h,nta-MIR172e,nta-MIR172g,nta-MIR172f,nta-MIR172i,nta-MIR172c,nta-MIR172d,nta-MIR172a,sly-MIR172b,sly-MIR172a,vvi-MIR172c,vvi-MIR172d,aqc-MIR172b,aqc-MIR172a,tcc-MIR172a,tcc…	mdm-MIR172l	agtcagtattcgcgggtgcagcatcatcaagattcacataccttagcaagggggctacctttagcgatcgagtaaattggtaccacaccaatatgaatattccttcaacttccttttgtacttgaaaggtagttycttcgaagtgGGAATCTTGATGATGCTGCAGcagctggtacatgact	mdm-miR172l	GGAATCTTGATGATGCTGCAG	380	204	70	134	156740	55132.5	101608	151362	55132.5	96230	0	n	...((((..(((((((...((.((((((.(((((((((..((((((((((((((((((....(((((...)))))..)))))..))))))))...)))))...))))))))).)))))).))...)))))))...))))...	5	1
11	5'	21	TGCATTTGCACCTGCACCTCT	csi-miR530a_2ss20TC21GT	gp2a	scf0513149	+	856421	856681	5'	tttatcTGCATTTGCACCTGCACCTCTtcgatcctagattaatggtttctgccaagtactactggaatgcagaagatcaatAGGTGCAGGTGTAAGTGCAGacga	21	14	27	48	19	19	26	41	109	csi-miR530a_2ss20TC21GT	TGCATTTGCACCTGCACCTCT	21	81	783	783	0	gp2a	12	csi-MIR530b,csi-MIR530a,ptc-MIR530a,ptc-MIR530b,tcc-MIR530b,tcc-MIR530a,mtr-MIR530,gma-MIR530a,gma-MIR530e,cme-MIR530a,htu-MIR530,osa-MIR530,	csi-MIR530a	ggcacgagatttttcTGCATTTGCACCTGCACCTTGctgtgctgttatctgggttgacgaagatcatcatgatgatcagcttcaaaactcgaaagcatgaaggtgcagctgtatatgcaggtgaatgcc	csi-miR530a	TGCATTTGCACCTGCACCTTG	139	110	107	3	85983	83787	2196	85901	83787	2114	0	y	....(((((((((((((((((((((.((.((((.........((((....)))).......(((.....)))..)))))).)))))))))))))))))))))...	2	0
11	3'	22	AGGTGCAGGTGTAAGTGCAG	ptc-MIR530b-p3_1ss12CT	gp2a	scf0513149	+	856421	856681	3'	tttatcTGCATTTGCACCTGCACCTCTtcgatcctagattaatggtttctgccaagtactactggaatgcagaagatcaatAGGTGCAGGTGTAAGTGCAGacga	8	8	5	8	7	11	5	7	88	ptc-MIR530b-p3_1ss12CT	AGGTGCAGGTGTAAGTGCAG	20	29	729	729	0	gp2a	12	csi-MIR530b,csi-MIR530a,ptc-MIR530a,ptc-MIR530b,tcc-MIR530b,tcc-MIR530a,mtr-MIR530,gma-MIR530a,gma-MIR530e,cme-MIR530a,htu-MIR530,osa-MIR530,	ptc-MIR530b	gccaatatgttgcctttatcTGCATTTGCACCTGCATCTTttgcgtttgttttgtttttgactccacaaacaaaatcaagttctgtcgatacagtatgtgggacaattagatatggaaactaataagcttagttgaggtgcaggtgcaagtgcaggtgaatgccattttggt	ptc-MIR530b-p3	aggtgcaggtgcaagtgcag	139	29	29	0	21141	21141	0	21141	21141	0	0	y	....(((((((((((((((((((((.((.((((.........((((....)))).......(((.....)))..)))))).)))))))))))))))))))))...	2	0
12	5'	23	GTTCCCTTGATCACTTCATTG	cme-MIR395a-p5_1ss11GT	gp2a	scf0513158	-	3272626	3272886	5'	ttttcaggtgtcccctagaGTTCCCTTGATCACTTCATTGggaagtttatataattatagctcaattatcccaCTGAAGTGTTTGGGGGAACTCCcggtgacatttgatat	20	20	29	44	18	27	28	37	111	cme-MIR395a-p5_1ss11GT	GTTCCCTTGATCACTTCATTG	21	106	778	778	0	gp2a	143	mdm-MIR395b,mdm-MIR395c,mdm-MIR395h,mdm-MIR395a,mdm-MIR395d,mdm-MIR395g,mdm-MIR395i,csi-MIR395,ptc-MIR395c,ptc-MIR395g,ptc-MIR395i,ptc-MIR395b,ptc-MIR395d,ptc-MIR395j,ptc-MIR395k,ptc-MIR395f,ptc-MIR395e,ptc-MIR395a,nta-MIR395c,nta-MIR395a,nta-MIR395b,sly-MIR395b,sly-MIR395a,vvi-MIR395c,vvi-MIR395a,vvi-MIR395i,vvi-MIR395k,vvi-MIR395h,vvi-MIR395m,vvi-MIR395d,vvi-MIR395f,vvi-MIR395b,vvi-MIR395l,vvi-…	cme-MIR395a	actagagttcccttgagcacttcattggaaaattggaaaatttgaaaatttcaaatttttgtccaaacctaCTGAAGTGTTTGGGGGAACTCtcggtgaca	cme-MIR395a-p5	gttcccttgagcacttcattg	215	113	113	0	87858	87858	0	87858	87858	0	0	y	...(((..((((.((..(((((((((..(.(((((((.(((((((((.(((....)))))))......))))).))))))).)..)))))))))..)).))))..)))...	4	0
12	3'	24	CTGAAGTGTTTGGGGGAACTCA	mdm-miR395i_R+1	gp2a	scf0513158	-	3272626	3272886	3'	ttttcaggtgtcccctagaGTTCCCTTGATCACTTCATTGggaagtttatataattatagctcaattatcccaCTGAAGTGTTTGGGGGAACTCCcggtgacatttgatat	15	15	23	40	13	20	22	34	71	mdm-miR395a_R+1	CTGAAGTGTTTGGGGGAACTCA	22	23	816	777	1	gp2a	143	mdm-MIR395b,mdm-MIR395c,mdm-MIR395h,mdm-MIR395a,mdm-MIR395d,mdm-MIR395g,mdm-MIR395i,csi-MIR395,ptc-MIR395c,ptc-MIR395g,ptc-MIR395i,ptc-MIR395b,ptc-MIR395d,ptc-MIR395j,ptc-MIR395k,ptc-MIR395f,ptc-MIR395e,ptc-MIR395a,nta-MIR395c,nta-MIR395a,nta-MIR395b,sly-MIR395b,sly-MIR395a,vvi-MIR395c,vvi-MIR395a,vvi-MIR395i,vvi-MIR395k,vvi-MIR395h,vvi-MIR395m,vvi-MIR395d,vvi-MIR395f,vvi-MIR395b,vvi-MIR395l,vvi-…	mdm-MIR395i	tcaggtgtcaccaagagttcccttgaccacttcattgggaaatagtctcttttgcaactaaatatcctaCTGAAGTGTTTGGGGGAACTCccggcggcatttga	mdm-miR395a	CTGAAGTGTTTGGGGGAACTC	215	92.5	8.5	84	70712.5	6689.5	64023	68080.5	6689.5	61391	0	y	...(((..((((.((..(((((((((..(.(((((((.(((((((((.(((....)))))))......))))).))))))).)..)))))))))..)).))))..)))...	4	0
13	5'	25	TGAAGCTGCCAGCATGATCTCA	mdm-miR167b_R+1_1ss21AC	gp2a	scf0513093	+	477163	477424	5'	atgttcgtgtacaagtcatagtTGAAGCTGCCAGCATGATCTCAacctctctcagatttctgagggaagcTCAGATCATGTGGTAGTTTCAcctgttgtttgtagcatgaagcc	37021	18995	42711	31362	33933	25333	41239	26538	75	mdm-miR167b_R+1_1ss21AC	TGAAGCTGCCAGCATGATCTCA	22	195092	818	818	0	gp2a	109	mdm-MIR167f,mdm-MIR167b,mdm-MIR167j,mdm-MIR167e,mdm-MIR167a,mdm-MIR167g,mdm-MIR167c,mdm-MIR167d,ccl-MIR167b,ccl-MIR167a,csi-MIR167a,csi-MIR167b,csi-MIR167c,ptc-MIR167f,ptc-MIR167g,ptc-MIR167e,ptc-MIR167a,ptc-MIR167b,ptc-MIR167d,ptc-MIR167c,ptc-MIR167h,nta-MIR167e,nta-MIR167c,nta-MIR167a,nta-MIR167b,vvi-MIR167c,vvi-MIR167d,vvi-MIR167b,vvi-MIR167a,vvi-MIR167e,aqc-MIR167,tcc-MIR167c,tcc-MIR167b,ghr-…	mdm-MIR167d	tcgtggaccaatagcggtTGAAGCTGCCAGCATGATCTAaacttccctcttggtcaaggaaagatcagatcatgtggtagcttcacctgttgatggggatcacga	mdm-miR167b	TGAAGCTGCCAGCATGATCTA	229105	130088	119130	10958.5	1.05663e+08	96714656	8.9481e+06	1.05281e+08	96714656	8.56641e+06	0	y	...((((((((((((..((((.(((((((((((.((((((((.....((((((((....)))))))).....))))))))))))))))))).))))..)))))).))))))...	1	1
13	3'	26	TCAGATCATGTGGTAGTTTCA	zma-MIR167j-p3_1ss14CT	gp2a	scf0513093	+	477163	477424	3'	atgttcgtgtacaagtcatagtTGAAGCTGCCAGCATGATCTCAacctctctcagatttctgagggaagcTCAGATCATGTGGTAGTTTCAcctgttgtttgtagcatgaagcc	110	74	83	43	101	99	80	36	74	zma-MIR167j-p3_1ss14CT	TCAGATCATGTGGTAGTTTCA	21	236	770	770	0	gp2a	109	mdm-MIR167f,mdm-MIR167b,mdm-MIR167j,mdm-MIR167e,mdm-MIR167a,mdm-MIR167g,mdm-MIR167c,mdm-MIR167d,ccl-MIR167b,ccl-MIR167a,csi-MIR167a,csi-MIR167b,csi-MIR167c,ptc-MIR167f,ptc-MIR167g,ptc-MIR167e,ptc-MIR167a,ptc-MIR167b,ptc-MIR167d,ptc-MIR167c,ptc-MIR167h,nta-MIR167e,nta-MIR167c,nta-MIR167a,nta-MIR167b,vvi-MIR167c,vvi-MIR167d,vvi-MIR167b,vvi-MIR167a,vvi-MIR167e,aqc-MIR167,tcc-MIR167c,tcc-MIR167b,ghr-…	zma-MIR167j	aTGAAGCTGCCAGCATGATCTGaaaccatacgtgttctttgattcccatctgaagaaagagttggctttcatggagaaccgacggtcaGATCATGTGGCAGTTTCATTt	zma-MIR167j-p3	tcaGATCATGTGGCAGTTTCA	229105	310	305	5	237866	234525	3341	237783	234525	3258	0	y	...((((((((((((..((((.(((((((((((.((((((((.....((((((((....)))))))).....))))))))))))))))))).))))..)))))).))))))...	1	1
14	5'	25	TGAAGCTGCCAGCATGATCTCA	mdm-miR167b_R+1_1ss21AC	gp2a	scf0513174	+	513180	513441	5'	ttgtcgtggatcacttgcagtTGAAGCTGCCAGCATGATCTAAgcttccctctcggccggttgTATACGAGTCAAGGAAAGATCAgatcatgtggcaacttcacctgttgatggcttcacgagta	37021	18995	42711	31362	33933	25333	41239	26538	75	mdm-miR167b_R+1_1ss21AC	TGAAGCTGCCAGCATGATCTCA		195092	818	779	1	gp2a	80	mdm-MIR167g,mdm-MIR167f,mdm-MIR167a,mdm-MIR167j,ccl-MIR167b,ccl-MIR167a,csi-MIR167b,csi-MIR167a,csi-MIR167c,ptc-MIR167b,ptc-MIR167d,ptc-MIR167f,ptc-MIR167g,ptc-MIR167e,nta-MIR167a,nta-MIR167c,nta-MIR167b,vvi-MIR167b,vvi-MIR167a,vvi-MIR167c,aqc-MIR167,tcc-MIR167b,tcc-MIR167c,ghr-MIR167a,dpr-MIR167b,dpr-MIR167c,mtr-MIR167b,lja-MIR167,gso-MIR167a,gma-MIR167a,gma-MIR167c,gma-MIR167e,gma-MIR167g,gma-M…	mdm-MIR167f	tctctgaagcctccaagatgaaagaagaacagaaagaaggagaagaagaatgacctagctacttgctatcttatcgtgcacctccaatagtTGAAGCTGCCAGCATGATCTAagctttctttgtacataggacaggctagatcatgtggtcgcttcacctgttgaatgaagcacgagaaaaccctagattcacagccatcgacctcctcaagaacccattagggttttttttttttttttcggaga	mdm-miR167b	TGAAGCTGCCAGCATGATCTA	197869	99084.5	2.5	99082	81026767	2239.5	8.10245e+07	7.71618e+07	2239.5	77159515	0	y	...((((((((((...((((.(((((.(((((.((((((((...(((.(((...(((((........)).))).))).)))...))))))))))))).))))).))))...))).)))))))...	2	1
15	5'	27	TTGACAGAAGAGAGTGAGCAC	mdm-miR156a_L+1	gp2a	scf0513058	+	367216	367476	5'	ttatgTTGACAGAAGAGAGTGAGCACaacccggcattggtggaagagagctttgtcactgttgggagtgtGCTCGCTCTTCTTCTGTCAGCaacatc	1066002	760579	869299	947170	977085	1014373	839334	801495	106	mdm-miR156a_L+1	TTGACAGAAGAGAGTGAGCAC	21	7218847	776	776	0	gp2a	81	mdm-MIR156c,mdm-MIR156n,mdm-MIR156e,mdm-MIR156j,mdm-MIR156f,mdm-MIR156k,mdm-MIR156a,mdm-MIR156t,mdm-MIR156u,mdm-MIR156w,csi-MIR156,ctr-MIR156,ptc-MIR156d,ptc-MIR156e,ptc-MIR156k,vvi-MIR156d,vvi-MIR156f,vvi-MIR156a,aqc-MIR529,tcc-MIR156g,tcc-MIR156f,tcc-MIR156a,ghr-MIR156d,vun-MIR156a,mtr-MIR156i,mtr-MIR156d,mtr-MIR156j,gma-MIR156h,gma-MIR156u,gma-MIR156a,gma-MIR156k,gma-MIR156n,gma-MIR156o,gma-MI…	mdm-MIR156a	agtTGACAGAAGAGAGTGAGCACacacaggcggyaattgtataaaatcatacytttgggcggtgcgtgctcacttctctctccgtcagct	mdm-miR156a	TGACAGAAGAGAGTGAGCAC	7286349	3643049	3642208	841	2827140715	2826425788	714927	2827111596	2826425788	685808	0	y	...((((((((((((((((((((((((.(((..((.(((..((.......))..))).))..)))..))))))))))).))))))))))))).....	1	1
15	3'	28	GCTCGCTCTTCTTCTGTCAGC	osa-miR156h-3p_2ss9CT14T-	gp2a	scf0513058	+	367216	367476	3'	ttatgTTGACAGAAGAGAGTGAGCACaacccggcattggtggaagagagctttgtcactgttgggagtgtGCTCGCTCTTCTTCTGTCAGCaacatc	48	23	27	32	44	30	26	27	91	osa-miR156h-3p_2ss9CT14T-	GCTCGCTCTTCTTCTGTCAGC	21	217	774	774	0	gp2a	81	mdm-MIR156c,mdm-MIR156n,mdm-MIR156e,mdm-MIR156j,mdm-MIR156f,mdm-MIR156k,mdm-MIR156a,mdm-MIR156t,mdm-MIR156u,mdm-MIR156w,csi-MIR156,ctr-MIR156,ptc-MIR156d,ptc-MIR156e,ptc-MIR156k,vvi-MIR156d,vvi-MIR156f,vvi-MIR156a,aqc-MIR529,tcc-MIR156g,tcc-MIR156f,tcc-MIR156a,ghr-MIR156d,vun-MIR156a,mtr-MIR156i,mtr-MIR156d,mtr-MIR156j,gma-MIR156h,gma-MIR156u,gma-MIR156a,gma-MIR156k,gma-MIR156n,gma-MIR156o,gma-MI…	osa-MIR156h	gagattgtTGACAGAAGAGAGTGAGCACacggcgcggcggctagccatcggcgggatgcctgcccccgccgcgtGCTCGCTCCTCTTTCTGTCAGCatctc	osa-miR156h-3p	GCTCGCTCCTCTTTCTGTCAGC	7286349	128.5	128	0.5	99243	98838.5	404.5	99222.5	98838.5	384	0	y	...((((((((((((((((((((((((.(((..((.(((..((.......))..))).))..)))..))))))))))).))))))))))))).....	1	1
16	5'	27	TTGACAGAAGAGAGTGAGCAC	mdm-miR156a_L+1	gp2a	scf0513058	+	367748	368008	5'	tatggatggtttatgaggaattatgTTGACAGAAGAGAGTGAGCACaaccccgcattgatgaaagagagctttgtcatttttgggAGTGTGCTCACTCTTCTTCTGtcagcatcatcaacaacacttaatcccca	1066002	760579	869299	947170	977085	1014373	839334	801495	106	mdm-miR156a_L+1	TTGACAGAAGAGAGTGAGCAC		7218847	776	776	0	gp2a	84	mdm-MIR156c,mdm-MIR156n,mdm-MIR156e,mdm-MIR156j,mdm-MIR156d,mdm-MIR156l,mdm-MIR156f,mdm-MIR156k,mdm-MIR156a,mdm-MIR156t,mdm-MIR156u,mdm-MIR156w,mdm-MIR156o,mdm-MIR156m,mdm-MIR156g,csi-MIR156,ctr-MIR156,ptc-MIR156d,ptc-MIR156e,ptc-MIR156f,ptc-MIR156k,nta-MIR156c,vvi-MIR156d,vvi-MIR156a,aqc-MIR529,tcc-MIR156g,tcc-MIR156c,tcc-MIR156a,ghr-MIR156d,ssl-MIR156,vun-MIR156a,dpr-MIR156b,mtr-MIR156i,mtr-MIR…	mdm-MIR156g	ggcggTGACAGAAGAGAGTGAGCACacatggtattttrttgcatgctgggttcatgctcgaagctttgcgtgcttaatctctatctgtcgcccc	mdm-miR156a	TGACAGAAGAGAGTGAGCAC	7284809	3642381	3642134	247	2826571627	2826368184	203443	2826562089	2826368184	193906	0	y	...(((((((...((..((...(((((((((((((((((((((((((..((((...((((.((((....))))))))....))))..))))))))))).))))))))))))))..))..))..)))..))))...	1	1
16	3'	29	AGTGTGCTCACTCTTCTTCTG	vvi-MIR156a-p3_1ss10TA	gp2a	scf0513058	+	367748	368008	3'	tatggatggtttatgaggaattatgTTGACAGAAGAGAGTGAGCACaaccccgcattgatgaaagagagctttgtcatttttgggAGTGTGCTCACTCTTCTTCTGtcagcatcatcaacaacacttaatcccca	12	4	4	7	11	5	3	6	103	vvi-MIR156a-p3_1ss10TA	AGTGTGCTCACTCTTCTTCTG	21	30	783	783	0	gp2a	84	mdm-MIR156c,mdm-MIR156n,mdm-MIR156e,mdm-MIR156j,mdm-MIR156d,mdm-MIR156l,mdm-MIR156f,mdm-MIR156k,mdm-MIR156a,mdm-MIR156t,mdm-MIR156u,mdm-MIR156w,mdm-MIR156o,mdm-MIR156m,mdm-MIR156g,csi-MIR156,ctr-MIR156,ptc-MIR156d,ptc-MIR156e,ptc-MIR156f,ptc-MIR156k,nta-MIR156c,vvi-MIR156d,vvi-MIR156a,aqc-MIR529,tcc-MIR156g,tcc-MIR156c,tcc-MIR156a,ghr-MIR156d,ssl-MIR156,vun-MIR156a,dpr-MIR156b,mtr-MIR156i,mtr-MIR…	vvi-MIR156a	agaaatatgtTGACAGAAGAGAGGGAGCACaacccagcatcagctaaagactctttgcttttcttgggagtgtgctctctcttcttctgtcatcatcacactcc	vvi-MIR156a-p3	agtgtgctctctcttcttctg	7284809	25.5	24	1.5	19985	18735.5	1249.5	19927.5	18735.5	1192	0	y	...(((((((...((..((...(((((((((((((((((((((((((..((((...((((.((((....))))))))....))))..))))))))))).))))))))))))))..))..))..)))..))))...	1	1
17	5'	30	GTGACAGAAGAGAGTGAGCACT	mdm-miR156a_L+1R+1	gp2a	scf0513091	-	123345	123606	5'	tctatggatggttatgaggaattatgTTGACAGAAGAGAGTGAGCACAacccctcattggcgaaagagagctttgtcactgttgggagtgtGCTCACTCTTCTTCTGTCAGCatcgctaaacagtaattcccatcactaatcatgtc	105	31	88	84	96	41	85	71	108	mdm-miR156a_L+1R+1	TTGACAGAAGAGAGTGAGCACC		213917	814	775	1	gp2a	176	mdm-MIR156c,mdm-MIR156f,mdm-MIR156k,mdm-MIR156n,mdm-MIR156e,mdm-MIR156j,mdm-MIR156a,mdm-MIR156d,mdm-MIR156i,mdm-MIR156l,mdm-MIR156u,mdm-MIR156t,mdm-MIR156w,mdm-MIR156m,mdm-MIR156g,mdm-MIR156ad,mdm-MIR156o,mdm-MIR156ae,csi-MIR156,ctr-MIR156,ptc-MIR156d,ptc-MIR156e,ptc-MIR156b,ptc-MIR156a,ptc-MIR156f,ptc-MIR156c,ptc-MIR156k,nta-MIR156e,nta-MIR156d,nta-MIR156a,nta-MIR156b,nta-MIR156c,nta-MIR156f,vvi…	mdm-MIR156o	gacggTGACAGAAGAGAGTGAGCACacatggtattttcttgcatgctgggttcatgcttgaagctttgcgtgcttactctctatctgtcaccatc	mdm-miR156a	TGACAGAAGAGAGTGAGCAC	468533	467056	1.5	467055	3.70536e+08	1187	3.70535e+08	353308825	1187	353307638	0	y	..((((..((((.(((.(((((((((((((((((((((((((((((((..(((.((.(((((((.......))))))).))..)))..))))))))))).)))))))))))))...........)))))))))).))))..))))..	1	1
17	3'	31	GCTCGCTCTTCTTCTGTCAGC	osa-miR156h-3p_2ss9CT14T-	gp2a	scf0513091	-	123345	123606	3'	tctatggatggttatgaggaattatgTTGACAGAAGAGAGTGAGCACAacccctcattggcgaaagagagctttgtcactgttgggagtgtGCTCACTCTTCTTCTGTCAGCatcgctaaacagtaattcccatcactaatcatgtc	48	23	27	32	44	30	26	27	91	osa-miR156h-3p_2ss9CT14T-	GCTCGCTCTTCTTCTGTCAGC		217	774	738	1	gp2a	176	mdm-MIR156c,mdm-MIR156f,mdm-MIR156k,mdm-MIR156n,mdm-MIR156e,mdm-MIR156j,mdm-MIR156a,mdm-MIR156d,mdm-MIR156i,mdm-MIR156l,mdm-MIR156u,mdm-MIR156t,mdm-MIR156w,mdm-MIR156m,mdm-MIR156g,mdm-MIR156ad,mdm-MIR156o,mdm-MIR156ae,csi-MIR156,ctr-MIR156,ptc-MIR156d,ptc-MIR156e,ptc-MIR156b,ptc-MIR156a,ptc-MIR156f,ptc-MIR156c,ptc-MIR156k,nta-MIR156e,nta-MIR156d,nta-MIR156a,nta-MIR156b,nta-MIR156c,nta-MIR156f,vvi…	osa-MIR156h	gagattgtTGACAGAAGAGAGTGAGCACacggcgcggcggctagccatcggcgggatgcctgcccccgccgcgtGCTCGCTCCTCTTTCTGTCAGCatctc	osa-miR156h-3p	GCTCGCTCCTCTTTCTGTCAGC	468533	148	23.5	124.5	115177	18331	96846	110684	18331	92353	0	y	..((((..((((.(((.(((((((((((((((((((((((((((((((..(((.((.(((((((.......))))))).))..)))..))))))))))).)))))))))))))...........)))))))))).))))..))))..	1	1
18	5'	32	TTGACAGAAGAGAGTGAGCAC	mdm-miR156a_L+1	gp2a	scf0513151	+	192158	192418	5'	aggggCTGACAGAAGAGAGTGAGCTCagattacacatttgtaatgagtactaagtttatcatcttcctcatgctacatatttgtgtaatgtgtGCTCACTTCTCTATCTGTCAGCtgca	1066002	760579	869299	947170	977085	1014373	839334	801495	106	mdm-miR156a_L+1	CTGACAGAAGAGAGTGAGCAC		2728	752	713	1	gp2a	93	mdm-MIR156d,mdm-MIR156l,mdm-MIR156t,mdm-MIR156u,mdm-MIR156w,mdm-MIR156ad,mdm-MIR156ae,mdm-MIR156aa,mdm-MIR156p,csi-MIR156,ctr-MIR156,ptc-MIR156a,ptc-MIR156f,ptc-MIR156c,ptc-MIR156k,nta-MIR156d,nta-MIR156c,nta-MIR156f,vvi-MIR156d,vvi-MIR156b,vvi-MIR156e,aqc-MIR529,tcc-MIR156c,tcc-MIR156a,ghr-MIR156c,mtr-MIR156i,mtr-MIR156d,mtr-MIR156c,mtr-MIR156j,mtr-MIR156a,gma-MIR156u,gma-MIR156a,gma-MIR156n,gma…	mdm-MIR156l	gagatagagagagagacagaggcagagagagagaaggtgaatggatgagggagagtagtagatcactggactagtagcgagtggtggTGACAGAAGAGAGTGAGCACactcgggcaattgtataaagccatacctttgcgtgatgtgtgctcacttctctttctgtcagccgcacgcccyccgcccyccgcccaccgcccaccgcctgcgctgccctccctttcattatgtctttctgtgttcctcctctcgatctc	mdm-miR156a	TGACAGAAGAGAGTGAGCAC	3583	3483	29	3454	2631086	21547	2609539	2497102	21547	2475555	0	y	...(((((((((((((((((((((.((.((((((((..(((((((((....(((........))).)))))..))))....)))))))).)).)))))).))))).))))))))))...	2	1
19	5'	33	GTGACAGAAGAGAGTGAGCACT	mdm-miR156a_L+1R+1	gp2a	scf0512968	+	1051168	1051429	5'	tttgggcgataaagggtaaaggagGTGACAGAAGAGAGTGAGCACAcacggtgttttcttgcctgctgtgtttcatgcttgaagctttgcgtGCTCACTCTCTATCTGTCACCccaagttcctttctctctcttc	105	31	88	84	96	41	85	71	108	mdm-miR156a_L+1R+1	GTGACAGAAGAGAGTGAGCACT	22	100	764	725	1	gp2a	71	mdm-MIR156c,mdm-MIR156n,mdm-MIR156e,mdm-MIR156j,mdm-MIR156f,mdm-MIR156a,mdm-MIR156d,mdm-MIR156l,mdm-MIR156ad,mdm-MIR156ae,csi-MIR156,ctr-MIR156,ptc-MIR156d,ptc-MIR156e,ptc-MIR156a,ptc-MIR156f,ptc-MIR156c,nta-MIR156c,nta-MIR156d,nta-MIR156f,vvi-MIR156b,vvi-MIR156e,tcc-MIR156g,tcc-MIR156c,vun-MIR156a,mtr-MIR156d,gma-MIR156h,gma-MIR156k,gma-MIR156q,gma-MIR156s,gma-MIR156u,rco-MIR156b,rco-MIR156d,cme…	mdm-MIR156l	gagatagagagagagacagaggcagagagagagaaggtgaatggatgagggagagtagtagatcactggactagtagcgagtggtggTGACAGAAGAGAGTGAGCACactcgggcaattgtataaagccatacctttgcgtgatgtgtgctcacttctctttctgtcagccgcacgcccyccgcccyccgcccaccgcccaccgcctgcgctgccctccctttcattatgtctttctgtgttcctcctctcgatctc	mdm-miR156a	TGACAGAAGAGAGTGAGCAC	310	308	0	308	235027	0	235027	224475	0	224475	0	y	...(((.((.((((((....((.((((((((((((((((((((((....(((........))).((...((((((....))))))...))))))))))))))).)))))))))))....)))))).)).)))...	1	1
20	5'	34	GGAATGTCGTCTGGTTCGAAA	gma-miR166i-5p_R+1_1ss20GA	gp2a	scf0513132	-	316689	316950	5'	ttctctccctaatagttgaggGGAATGTCGTCTGGTTCGAAAtcgttctgtgagctcaagtatgatcatcaggatgattTCGGACCAGGCTTCATTCCCCTcaaactaggagacat	732	345	618	1019	671	460	597	862	30	gma-miR166i-5p_R+1_1ss20GA	GGAATGTCGTCTGGTTCGAAA	21	1517	779	779	0	gp2a	88	mdm-MIR166c,crt-MIR166a,crt-MIR166b,csi-MIR166d,csi-MIR166b,csi-MIR166c,ptc-MIR166d,ptc-MIR166f,ptc-MIR166e,nta-MIR166c,sly-MIR166a,vvi-MIR166f,vvi-MIR166b,vvi-MIR166g,aqc-MIR166a,aqc-MIR166d,tcc-MIR166b,tcc-MIR166c,tcc-MIR166a,ssl-MIR166a,dpr-MIR166a,mtr-MIR166e,mtr-MIR166c,mtr-MIR166f,gma-MIR166c,gma-MIR166e,gma-MIR166u,gma-MIR166j,gma-MIR166m,gma-MIR166r,gma-MIR166h,gma-MIR166k,gma-MIR166i,gma…	gma-MIR166i	gttgaggGGAATGTCGTCTGGTTCGAGaccattcatgcaagtagtctcagacatgactcttctgagtgattTCGGACCAGGCTTCATTCCCCtcagc	gma-miR166i-5p	GGAATGTCGTCTGGTTCGAG	7850	2714	2584	130	2096694	1998145	98549	2092604	1998145	94459	0	y	...(((((....(((((((((((((((..((((((((((((((((((((((((..(((....)))))).)))))))))))))))))))))..)))))))))))).))))))))...	4	0
20	3'	35	TCGGACCAGGCTTCATTCCCCC	mdm-miR166a_R+1	gp2a	scf0513132	-	316689	316950	3'	ttctctccctaatagttgaggGGAATGTCGTCTGGTTCGAAAtcgttctgtgagctcaagtatgatcatcaggatgattTCGGACCAGGCTTCATTCCCCTcaaactaggagacat	1605	945	1564	2507	1471	1260	1510	2121	105	mdm-miR166a_R+1	TCGGACCAGGCTTCATTCCCCA		2644	818	780	1	gp2a	88	mdm-MIR166c,crt-MIR166a,crt-MIR166b,csi-MIR166d,csi-MIR166b,csi-MIR166c,ptc-MIR166d,ptc-MIR166f,ptc-MIR166e,nta-MIR166c,sly-MIR166a,vvi-MIR166f,vvi-MIR166b,vvi-MIR166g,aqc-MIR166a,aqc-MIR166d,tcc-MIR166b,tcc-MIR166c,tcc-MIR166a,ssl-MIR166a,dpr-MIR166a,mtr-MIR166e,mtr-MIR166c,mtr-MIR166f,gma-MIR166c,gma-MIR166e,gma-MIR166u,gma-MIR166j,gma-MIR166m,gma-MIR166r,gma-MIR166h,gma-MIR166k,gma-MIR166i,gma…	mdm-MIR166c	agttgtggggaatgttgtctggttcgagatctttcaataaaacttgaagatcgttatcatctgaatgatcTCGGACCAGGCTTCATTCCCCtcaact	mdm-miR166a	TCGGACCAGGCTTCATTCCCC	7850	3992.5	0	3992.5	3.1301e+06	0	3.1301e+06	3000550	0	3000550	0	y	...(((((....(((((((((((((((..((((((((((((((((((((((((..(((....)))))).)))))))))))))))))))))..)))))))))))).))))))))...	4	0
21	3'	35	TCGGACCAGGCTTCATTCCCCC	mdm-miR166a_R+1	gp2a	scf0513099	-	580825	581086	3'	ctctgtgatcgaaaatgggtctgaaacagttgttgaggGGAATGCTGGCTGGTTCGAGAccaatattagtggtctgcagcaagggaagaacatgagcacctgaatgatgatcTCGGACCAGGCTTCATTCCCCCcaatactaaactttcatgcatcgatcgatctcattg	1605	945	1564	2507	1471	1260	1510	2121	105	mdm-miR166a_R+1	TCGGACCAGGCTTCATTCCCCC	22	2962	784	784	0	gp2a	157	mdm-MIR166f,mdm-MIR166h,mdm-MIR166c,mdm-MIR166a,mdm-MIR166g,mdm-MIR166d,mdm-MIR166b,crt-MIR166a,crt-MIR166b,csi-MIR166c,csi-MIR166a,csi-MIR166e,csi-MIR166d,csi-MIR166b,ctr-MIR166,ptc-MIR166a,ptc-MIR166i,ptc-MIR166l,ptc-MIR166b,ptc-MIR166h,ptc-MIR166m,ptc-MIR166j,ptc-MIR166g,ptc-MIR166e,ptc-MIR166c,ptc-MIR166q,ptc-MIR166n,ptc-MIR166o,nta-MIR166d,nta-MIR166b,nta-MIR166f,nta-MIR166c,nta-MIR166a,nta-…	mdm-MIR166b	gttgtggggaatgctgtctggttcgagaccattcctctgaaacaaagaacatgaacatrgaatgatcTCGGACCAGGCTTCATTCCCCccaac	mdm-miR166a	TCGGACCAGGCTTCATTCCCC	7932	6619.5	3153.5	3466	5.02194e+06	2472400	2.54954e+06	4894187	2472400	2421787	0	y	...((.((((((......(..(((((.((.(((((.((((((((..(((((((((((((.((..(((...(((((.((..............)))).)))..)))..)).))))))))))).)).)))))))).)))))))....)))))..).....)))))).))...	3	1
22	5'	36	GCAGCATCATCCAGATTCAC	sbi-MIR172a-p5_1ss12AC	gp2a	scf0513008	+	493334	493594	5'	cactgatgcagtcattgtttgcgggtGCAGCATCATCCAGATTCACaggttttattactgacatcctcatttgaatctttgagatgtcatgatgatccgagttgAGAATCTTGATGATGCTGCATcagccatatatgactatatacatac	740	763	552	814	678	1018	533	688	148	sbi-MIR172a-p5_1ss12AC	GCAGCATCATCCAGATTCAC	20	1471	745	745	0	gp2a	111	mdm-MIR172e,mdm-MIR172b,mdm-MIR172d,mdm-MIR172c,mdm-MIR172a,mdm-MIR172g,mdm-MIR172l,mdm-MIR172i,csi-MIR172a,csi-MIR172c,csi-MIR172b,ptc-MIR172b,ptc-MIR172f,ptc-MIR172a,ptc-MIR172c,ptc-MIR172d,ptc-MIR172e,ptc-MIR172h,ptc-MIR172g,nta-MIR172h,nta-MIR172e,nta-MIR172g,nta-MIR172f,nta-MIR172i,nta-MIR172c,nta-MIR172d,nta-MIR172a,nta-MIR172j,nta-MIR172b,sly-MIR172b,sly-MIR172a,vvi-MIR172d,vvi-MIR172c,vvi…	sbi-MIR172a	gtgcagcatcatcaagattcacatccagctcatcctcggtgatatgctatatacataaatatatgcgtatgtgatgagatgAGAATCTTGATGATGCTGCAt	sbi-MIR172a-p5	gcagcatcatcaagattcac	33772	2868	2708	160	2188727	2059772	128955	2182558	2059772	122786	0	y	...((((..((((((.....((.((((((((((((((.((((((.((((..((((((.(((((((.(((..........)))))))))))))))).))....)).)))))).)))))))))))))).)).....))))))..)).))...	2	0
22	3'	37	AGAATCTTGATGATGCTGCAT	mdm-miR172g_R+1	gp2a	scf0513008	+	493334	493594	3'	cactgatgcagtcattgtttgcgggtGCAGCATCATCCAGATTCACaggttttattactgacatcctcatttgaatctttgagatgtcatgatgatccgagttgAGAATCTTGATGATGCTGCATcagccatatatgactatatacatac	4059	2670	4764	3965	3720	3560	4599	3355	69	mdm-miR172a_R+1	AGAATCTTGATGATGCTGCAT	21	29762	781	781	0	gp2a	111	mdm-MIR172e,mdm-MIR172b,mdm-MIR172d,mdm-MIR172c,mdm-MIR172a,mdm-MIR172g,mdm-MIR172l,mdm-MIR172i,csi-MIR172a,csi-MIR172c,csi-MIR172b,ptc-MIR172b,ptc-MIR172f,ptc-MIR172a,ptc-MIR172c,ptc-MIR172d,ptc-MIR172e,ptc-MIR172h,ptc-MIR172g,nta-MIR172h,nta-MIR172e,nta-MIR172g,nta-MIR172f,nta-MIR172i,nta-MIR172c,nta-MIR172d,nta-MIR172a,nta-MIR172j,nta-MIR172b,sly-MIR172b,sly-MIR172a,vvi-MIR172d,vvi-MIR172c,vvi…	mdm-MIR172g	gtcgttgtttgcgggtgtggcatcatcaagattcacacatgcaattaactgataaagttgtttgaaagtgAGAATCTTGATGATGCTGCAtcggcaataaaccac	mdm-miR172a	AGAATCTTGATGATGCTGCA	33772	15456	15067	389	1.20695e+07	1.17647e+07	304813	1.20575e+07	1.17647e+07	292798	0	y	...((((..((((((.....((.((((((((((((((.((((((.((((..((((((.(((((((.(((..........)))))))))))))))).))....)).)))))).)))))))))))))).)).....))))))..)).))...	2	0
23	5'	36	GCAGCATCATCCAGATTCAC	sbi-MIR172a-p5_1ss12AC	gp2a	scf0513174	-	6281	6540	5'	gtcgtttattgccgatGCAGCATCATCAAGATTCtcagtactttcaaacaactatggcagacagagagggagtttgagttgcatcaattgcatgtgtgaatcttcatgatgctacagccgcaaacaacaac	740	763	552	814	678	1018	533	688	148	sbi-MIR172a-p5_1ss12AC	GCAGCATCATCCAGATTC		2	685	646	1	gp2a	17	mdm-MIR172l,mdm-MIR172d,mdm-MIR172i,ptc-MIR172a,ptc-MIR172c,vvi-MIR172a,vvi-MIR172b,vvi-MIR172d,cme-MIR172f,bna-MIR172c,egu-MIR172b,egu-MIR172a,egu-MIR172c,egu-MIR172d,egu-MIR172f,egu-MIR172e,sbi-MIR172a,	sbi-MIR172a	gtgcagcatcatcaagattcacatccagctcatcctcggtgatatgctatatacataaatatatgcgtatgtgatgagatgAGAATCTTGATGATGCTGCAt	sbi-MIR172a-p5	gcagcatcatcaagattc	5	2.5	0	2.5	1721.5	0	1721.5	1624.5	0	1624.5	0	y	...(((..((((...((.((((((((.(((((((.((.....(((((((..((.((.....))....))..))))))).((((.....))))..)).))))))).)))))))).))...))))..)))...	2	0
23	3'	37	AGAATCTTGATGATGCTGCAT	mdm-miR172g_R+1	gp2a	scf0513174	+	6282	6542	3'	gctGTAGCATCATGAAGATTCACacatgcaattgatgcaactcaaactccctctctgtctgccatagttgtttgaaagtactgAGAATCTTGATGATGCTGCATcggcaa	4059	2670	4764	3965	3720	3560	4599	3355	69	mdm-miR172a_R+1	AGAATCTTGATGATGCTGCAT		29762	781	781	0	gp2a	106	mdm-MIR172e,mdm-MIR172d,mdm-MIR172g,mdm-MIR172b,mdm-MIR172c,mdm-MIR172a,mdm-MIR172i,mdm-MIR172l,csi-MIR172a,csi-MIR172c,csi-MIR172b,ptc-MIR172b,ptc-MIR172f,ptc-MIR172a,ptc-MIR172c,ptc-MIR172d,ptc-MIR172e,ptc-MIR172h,ptc-MIR172g,nta-MIR172h,nta-MIR172e,nta-MIR172g,nta-MIR172f,nta-MIR172i,nta-MIR172c,nta-MIR172d,nta-MIR172j,nta-MIR172a,nta-MIR172b,sly-MIR172b,sly-MIR172a,vvi-MIR172d,vvi-MIR172c,vvi…	mdm-MIR172a	ggtcactttttgcgggtggagcatcatcaygattcacaatcttacttggttctagtttaaccccatttgatgatatgAGAATCTTGATGATGCTGCAgcagcaataatgact	mdm-miR172a	AGAATCTTGATGATGCTGCA	30578	15277	14932	345	1.19312e+07	11659112	272100	1.19197e+07	11659112	260556	0	y	(((((((((((((.(((((((.((..((((.....))))..((((((.....((.((.....)).))..))))))......)).))))))).)))))))))))...))..	2	0
24	5'	38	TTCCACAGCTTTCTTGAACTG	mdm-miR396b	gp2a	scf0513105	+	1066572	1066832	5'	tggtgatcctctttgtattcTTCCACAGCTTTCTTGAACTGcatccagcataagagatctgatctttgcatttgaggcagaggttgctctatatttggcatgtgGTTCAATAAAGCTGTGGGAAGatacagacaggttcaaga	324	137	349	466	297	183	336	394	47	mdm-miR396b	TTCCACAGCTTTCTTGAACTG	21	2141	781	781	0	gp2a	81	mdm-MIR396b,mdm-MIR396a,mdm-MIR396c,mdm-MIR396d,mdm-MIR396e,ccl-MIR396,csi-MIR396a,csi-MIR396b,csi-MIR396c,ptc-MIR396b,ptc-MIR396a,ptc-MIR396d,ptc-MIR396c,ptc-MIR396e,nta-MIR396a,nta-MIR396c,nta-MIR396b,vvi-MIR396d,vvi-MIR396c,vvi-MIR396b,vvi-MIR396a,bgy-MIR396a,bgy-MIR396b,bcy-MIR396a,aqc-MIR396a,aqc-MIR396b,tcc-MIR396b,tcc-MIR396a,tcc-MIR396c,tcc-MIR396e,ghr-MIR396b,ghr-MIR396a,ssl-MIR396,dpr-M…	mdm-MIR396b	gaagatgatgatcctctttgtattcTTCCACAGCTTTCTTGAACTGcatccatctatggcgagatcgaccgatctttggagtgagtcgactcagtatctctattccccttaacttggtttgcggttcaataaagctgtgggaagatacagataggctcaataaaattc	mdm-miR396b	TTCCACAGCTTTCTTGAACTG	4098	1275	1263	12	980556	971481	9075	980191	971481	8710	0	y	...(((.(((.(((((((..((((((((((((.((((((..(((((((.(((((((....(((((((((.......))))))))).)))).))))))).)))..)))))).))))))))))))..))))))).))).)))...	2	0
24	3'	39	GTTCAATAAAGCTGTGGGAAG	gma-miR396a-3p_L+1	gp2a	scf0513105	+	1066572	1066832	3'	tggtgatcctctttgtattcTTCCACAGCTTTCTTGAACTGcatccagcataagagatctgatctttgcatttgaggcagaggttgctctatatttggcatgtgGTTCAATAAAGCTGTGGGAAGatacagacaggttcaaga	247	195	204	129	226	259	197	109	112	gma-miR396a-3p_L+1	GTTCAATAAAGCTGTGGGAAG		809	776	776	0	gp2a	81	mdm-MIR396b,mdm-MIR396a,mdm-MIR396c,mdm-MIR396d,mdm-MIR396e,ccl-MIR396,csi-MIR396a,csi-MIR396b,csi-MIR396c,ptc-MIR396b,ptc-MIR396a,ptc-MIR396d,ptc-MIR396c,ptc-MIR396e,nta-MIR396a,nta-MIR396c,nta-MIR396b,vvi-MIR396d,vvi-MIR396c,vvi-MIR396b,vvi-MIR396a,bgy-MIR396a,bgy-MIR396b,bcy-MIR396a,aqc-MIR396a,aqc-MIR396b,tcc-MIR396b,tcc-MIR396a,tcc-MIR396c,tcc-MIR396e,ghr-MIR396b,ghr-MIR396a,ssl-MIR396,dpr-M…	gma-MIR396a	tcatggctctctttgtattcTTCCACAGCTTTCTTGAACTGcatccaaagagttcctttgcatgcatgccatggcactcttactcccaaatcttgttttgcggTTCAATAAAGCTGTGGGAAGatacagatagggtcaac	gma-miR396a-3p	TTCAATAAAGCTGTGGGAAG	4098	809	768.5	40.5	610454	579421	31033.5	609080	579421	29658.5	0	y	...(((.(((.(((((((..((((((((((((.((((((..(((((((.(((((((....(((((((((.......))))))))).)))).))))))).)))..)))))).))))))))))))..))))))).))).)))...	2	0
25	3'	38	TTCCACAGCTTTCTTGAACTG	mdm-miR396b	gp2a	scf0513148	+	214169	214429	5'	tatgatcctccttgtgattTTCCACAGCTTTCTTGAACTGtaaagtgccttaattatgaactaggagattaacctccatgcagtttcaacagagcaagaacaGTCCGAGAAAGCTGTGAAAAataacaggcaggatctga	324	137	349	466	297	183	336	394	47	mdm-miR396b	TTCCACAGCTTTCTTGAACTG		2141	781	781	0	gp2a	81	mdm-MIR396b,mdm-MIR396c,mdm-MIR396d,mdm-MIR396e,mdm-MIR396a,mdm-MIR396g,mdm-MIR396f,ccl-MIR396,csi-MIR396a,csi-MIR396b,csi-MIR396c,ptc-MIR396b,ptc-MIR396a,ptc-MIR396d,ptc-MIR396c,ptc-MIR396e,nta-MIR396a,nta-MIR396c,nta-MIR396b,vvi-MIR396d,vvi-MIR396c,vvi-MIR396b,vvi-MIR396a,bgy-MIR396a,bgy-MIR396b,bcy-MIR396a,aqc-MIR396a,aqc-MIR396b,tcc-MIR396b,tcc-MIR396a,tcc-MIR396c,tcc-MIR396e,ghr-MIR396b,ghr-…	mdm-MIR396b	gaagatgatgatcctctttgtattcTTCCACAGCTTTCTTGAACTGcatccatctatggcgagatcgaccgatctttggagtgagtcgactcagtatctctattccccttaacttggtttgcggttcaataaagctgtgggaagatacagataggctcaataaaattc	mdm-miR396b	TTCCACAGCTTTCTTGAACTG	2667	1424.5	1410.5	14	1.06981e+06	1.05828e+06	11531	1.06927e+06	1.05828e+06	10986	0	y	...((((((.(((((.(((((.(((((((((((((.(((((....(((((.......(((((.((((......))))....)))))....)).)))...))))).))))))))))))).))))).))))).))))))...	2	0
26	5'	39	GTTCAATAAAGCTGTGGGAAG	gma-miR396a-3p_L+1	gp2a	scf0513104	-	199769	200029	3'	gatcctctttatatctTTCCACAGCTTTCTTGAACTGcatctagcataagatatctgatctctgcatgcgGTTCAATAAAGCTGTGGGAAGatacaaacaggttc	247	195	204	129	226	259	197	109	112	gma-miR396a-3p_L+1	GTTCAATAAAGCTGTGGGAAG	21	809	776	776	0	gp2a	94	mdm-MIR396b,mdm-MIR396a,mdm-MIR396c,mdm-MIR396d,mdm-MIR396e,mdm-MIR396g,mdm-MIR396f,ccl-MIR396,csi-MIR396a,csi-MIR396b,csi-MIR396c,ptc-MIR396b,ptc-MIR396a,ptc-MIR396d,ptc-MIR396c,ptc-MIR396e,ptc-MIR396f,ptc-MIR396g,nta-MIR396a,nta-MIR396c,nta-MIR396b,vvi-MIR396d,vvi-MIR396c,vvi-MIR396b,vvi-MIR396a,bgy-MIR396a,bgy-MIR396b,bcy-MIR396a,aqc-MIR396a,aqc-MIR396b,tcc-MIR396b,tcc-MIR396a,tcc-MIR396c,tcc-…	gma-MIR396a	tcatggctctctttgtattcTTCCACAGCTTTCTTGAACTGcatccaaagagttcctttgcatgcatgccatggcactcttactcccaaatcttgttttgcggTTCAATAAAGCTGTGGGAAGatacagatagggtcaac	gma-miR396a-3p	TTCAATAAAGCTGTGGGAAG	2728	774	696	78	591650	531332	60317.5	589098	531332	57766.5	0	y	((.(((.(((.(((((((((((((((((.(((((((((((...(((..((((.....)))).)))))))))))))).))))))))))))))))).))).))).))	2	0
27	3'	40	TCTTTCCCATTCCTCCCATCCC	mtr-MIR1510a-p3_1ss5AT	gp2a	scf0513122	-	223196	223457	3'	taggcaagcccttggagttggatgggagggcaaggtagacttgtgaggaagttgtagttgggatgggaggctagggaagaaattactggaaactcatcctaattTCTTTCCTATTCCTCCCATCCCtcctcaatttcccaaggtttctccctttcctcttcccagtcttttttgctttgcaac	111	79	87	45	102	105	84	38	54	mtr-MIR1510a-p3_1ss5AT	TCTTTCCCATTCCTCCCATCCC	22	317	807	771	1	gp2a	10	mdm-MIR482b,sly-MIR5301,vvi-MIR482,ghr-MIR482a,mtr-MIR1510a,pta-MIR482c,pab-MIR482b,pab-MIR482c,pde-MIR482a,pde-MIR482b,	mtr-MIR1510a	aaagttgctattgcaattgTTGTCTTACCCATTCCTCCCAtcccataaatctattatatgtactccatcatcatatggatccactcttgtcttatgataatagagtcgcatgataggaatcttggatCGGAGGATTAGGTAAAACAACtattgcattaggcttt	mtr-MIR1510a-p3	TCTTACCCATTCCTCCCAtccc	322	322	0	322	259482	0	259482	247966	0	247966	0	y	...((((((....(((.((((...((((((.((((.((((((.((.((((((((.((..(((((((((((.((((((((((((((..(((......)))))))))))))))))..)))))))))))..))))))))))))))))))...))))))))))..))))))).....)))).))...	3	1
28	5'	41	CTGACAGAAGATAGAGAGCAC	mdm-miR156ac_L+1	gp2a	scf0512967	-	320923	321183	5'	catgggagatgttgttgttgGTGACAGAAGATAGAGAGCACagatggatgatttgcaaatatatgcatctcactcctttgtgctctctatgcttcctgtcatcagtgttagcacatactctccta	28	21	18	23	25	28	17	19	89	mdm-miR156aa_L+1	CTGACAGAAGATAGAGAGCAC	21	101	745	721	1	gp2a	17	mdm-MIR156p,mdm-MIR156aa,mdm-MIR156ab,mdm-MIR156ac,ptc-MIR156l,mtr-MIR156f,mtr-MIR156g,gma-MIR156r,cme-MIR156f,cme-MIR156e,ath-MIR157d,ath-MIR156h,aly-MIR157d,aly-MIR156h,smo-MIR156b,smo-MIR156c,pta-MIR156a,	mdm-MIR156ac	caatctctaatcatattatagtattaaatttagggtaaggactagggaactgggagagagaaagagcagggagtggtgatacgttgtTGACAGAAGATAGAGAGCACagatggatgacttgcaatggactatgcatctcactcctttgtgctctctatgcttctgtcatcacctagctatatccagcttccctgcccctcccccacacccctgcacctcccatattaatctaattcataaaatgattatttgattg	mdm-miR156aa	TGACAGAAGATAGAGAGCAC	176	88.5	0	88.5	64518	0	64518	62057.5	0	62057.5	0	y	..((((((((((((((((((((((((((((((((((((((((((.((((((..((((......))))..))).))))))))))))))))).)))).)))))))))...))))).))).)))))))	1	1
29	5'	42	TTGACAGAAGATAGAGGGCAC	mdm-miR156ac_L+1_1ss17AG	gp2a	scf0513135	-	1782870	1783130	5'	tgTTGACAGAAGATAGAGAGCACagatggatgacttgcaatgaatatgcatctcactcctttgtGCTCTCTATGCTTCTGTCATCa	82	161	51	64	75	214	49	54	128	mdm-miR156aa_L+1_1ss17AG	TTGACAGAAGATAGAGGGCAC	21	258	697	681	1	gp2a	36	mdm-MIR156aa,mdm-MIR156p,mdm-MIR156t,mdm-MIR156u,mdm-MIR156w,mdm-MIR156ab,mdm-MIR156ac,ptc-MIR156l,vvi-MIR156a,bgy-MIR156,aqc-MIR529,tcc-MIR156a,mtr-MIR156f,mtr-MIR156g,gma-MIR156b,gma-MIR156f,gma-MIR156l,gma-MIR156r,ahy-MIR156c,ahy-MIR156b,ahy-MIR156a,rco-MIR156e,cme-MIR156f,cme-MIR156e,ath-MIR157d,ath-MIR156h,aly-MIR157d,aly-MIR156h,aly-MIR157b,smo-MIR156b,smo-MIR156c,smo-MIR156d,pta-MIR156b,pt…	mdm-MIR156ac	caatctctaatcatattatagtattaaatttagggtaaggactagggaactgggagagagaaagagcagggagtggtgatacgttgtTGACAGAAGATAGAGAGCACagatggatgacttgcaatggactatgcatctcactcctttgtgctctctatgcttctgtcatcacctagctatatccagcttccctgcccctcccccacacccctgcacctcccatattaatctaattcataaaatgattatttgattg	mdm-miR156aa	TGACAGAAGATAGAGAGCAC	649	357	0.5	356.5	254676	320.5	254355	247191	320.5	246870	0	y	.(.(((((((((((((((((((((((.((((((..((((.......))))..))).))))))))))))))))).))))))))).).	1	1
30	5'	43	TTGACGGAAGAGAGCGAGCAC	sbi-miR156e_L+1_1ss6AG	gp2a	scf0513091	-	124124	124384	5'	catgtgtagagatggtttttgagggggagaggttatgTTGACGGAAGAGAGCGAGCACaacccggcattggtgaaagagagctttgccactgttgggagtgtactcgttcttcttccgtcagcgacatcatcaacacttattcccatctttgatcatctcgatcaccag	522	388	568	499	478	517	548	422	56	sbi-miR156e_L+1_1ss6AG	TTGACGGAAGAGAGCGAGCAC	21	946	777	777	0	gp2a	46	mdm-MIR156c,mdm-MIR156f,mdm-MIR156k,mdm-MIR156n,mdm-MIR156e,mdm-MIR156j,mdm-MIR156a,ptc-MIR156d,ptc-MIR156e,ptc-MIR156k,vvi-MIR156a,tcc-MIR156a,tcc-MIR156g,ghr-MIR156d,vun-MIR156a,dpr-MIR156a,mtr-MIR156i,mtr-MIR156d,gma-MIR156h,gma-MIR156o,gma-MIR156k,gma-MIR156n,rco-MIR156e,rco-MIR156b,cme-MIR156j,cme-MIR156d,cme-MIR156h,cme-MIR156g,bna-MIR156f,ath-MIR156d,aly-MIR156d,hci-MIR156b,htu-MIR156a,bdi…	sbi-MIR156e	cgattaggccctgaagagatTGACAGAAGAGAGCGAGCACccggcgcggcggccggcatggagcgcatgccgtccccgccgcgtgctcgcttctctttctgtcagcctctctctcgtcctggg	sbi-miR156e	TGACAGAAGAGAGCGAGCAC	1982	1976	1003	973	1.5081e+06	776943	731158	1.4741e+06	776943	697158	0	y	...(((..(((((((((...((.(((((((((((.((((((((((((((((((((.(((.(((..((.(((..((.......))..))).))..)))..))).))))))).)))))))))))))........))).))).))))).))...)))))))))...)))...	2	1
31	5'	44	TGGAGAAGCAGGGCACGTGCA	mdm-miR164e	gp2a	scf0513144	-	326181	326441	5'	ggtgagggttcctcgtTGGAGAAGCAGGGCACGTGCAaaacccttcggctaatacttcagctgaaaagctcttgCACGTGCTCCCCTTCTCCAACatgggttcctcatc	58872	62742	48216	52595	53961	83677	46554	44505	50	mdm-miR164b	TGGAGAAGCAGGGCACGTGCA	21	206358	773	773	0	gp2a	79	mdm-MIR164f,mdm-MIR164d,mdm-MIR164c,mdm-MIR164b,mdm-MIR164e,mdm-MIR164a,csi-MIR164,ctr-MIR164,ptc-MIR164e,ptc-MIR164a,ptc-MIR164b,ptc-MIR164c,ptc-MIR164d,nta-MIR164a,vvi-MIR164c,vvi-MIR164d,vvi-MIR164a,tcc-MIR164b,tcc-MIR164a,ghr-MIR164,ssl-MIR164b,ssl-MIR164a,mtr-MIR164c,mtr-MIR164a,mtr-MIR164b,gma-MIR164i,gma-MIR164g,gma-MIR164d,gma-MIR164a,gma-MIR164e,gma-MIR164j,gma-MIR164b,gma-MIR164f,gma-MI…	mdm-MIR164e	gaTGGAGAAGCAGGGCACGTGCAtttctaactcattcgcatatactgkgatytatatactcaatactcttatttttctctgagctgctaaattattacaagtttacagatatatatctcatatccagtgatgagttagttgttcatgtgcccctcttccccatc	mdm-miR164b	TGGAGAAGCAGGGCACGTGCA	222601	222423	207469	14954	1.71892e+08	160348846	1.15429e+07	1.71382e+08	160348846	1.10334e+07	0	y	(((((((..(((..((((((((((..((((((((((((.....(((((((........)))))))......))))))))))))..))))))))))..)))..)))))))	4	0
32	5'	45	TGGAGAAGCAGGGCACGTGCC	mdm-miR164d_1ss21AC	gp2a	scf0513164	-	2080663	2080923	5'	gttgaggaggactcctcgtTGGAGAAGCAGGGCACGTGGCtcttgCACGTGCTCTCCTTCTCCAACatgggttcctcatctct	456	494	606	480	418	658	585	406	118	mdm-miR164b_1ss21AC	TGGAGAAGCAGGGCACGTGCC	21	1515	772	734	1	gp2a	78	mdm-MIR164c,mdm-MIR164b,mdm-MIR164e,mdm-MIR164f,mdm-MIR164d,mdm-MIR164a,csi-MIR164,ctr-MIR164,ptc-MIR164e,ptc-MIR164b,ptc-MIR164c,ptc-MIR164a,ptc-MIR164d,nta-MIR164a,vvi-MIR164c,vvi-MIR164d,vvi-MIR164a,tcc-MIR164b,tcc-MIR164a,ghr-MIR164,ssl-MIR164b,ssl-MIR164a,mtr-MIR164c,mtr-MIR164a,mtr-MIR164b,gma-MIR164e,gma-MIR164j,gma-MIR164f,gma-MIR164h,gma-MIR164c,gma-MIR164i,gma-MIR164g,gma-MIR164d,gma-MI…	mdm-MIR164d	tgggtgagtagctcctgtTGGAGAAGCAGGGCACGTGCAaattctagctcaagcacttcctccctgggagcttagcttaagatttaacaaagctttgcacgtgctccccttctccaacacaagtttctcacctca	mdm-miR164b	TGGAGAAGCAGGGCACGTGCA	2211	2034	356	1678	1.53019e+06	242395	1.2878e+06	1466371	242395	1223976	0	y	...((((((((..((..((((((((((.((((((((((.(....))))))))))).))))))))))..))..)))))..))).	2	1
33	3'	46	GCGGACCAGGCTTCATTCCCC	mdm-miR166b_1ss1TG	gp2a	scf0513099	-	588367	588627	3'	tgtgatcgaaaatgagtctgaaactgttgttgaggGGAATGCTGGCTGGTTCGAGAccaatattagtggtctgcagcaagcgaagaacatgagcacctgaatgatgatcTCGGACCAGGCTTCATTCCCCccaatactaaactttcattcatcgatccat	991	389	984	1607	908	519	950	1359	33	mdm-miR166a_1ss1TG	GCGGACCAGGCTTCATTCCCC	21	2113	707	690	1	gp2a	160	mdm-MIR166f,mdm-MIR166h,mdm-MIR166c,mdm-MIR166a,mdm-MIR166g,mdm-MIR166d,mdm-MIR166b,crt-MIR166a,crt-MIR166b,csi-MIR166c,csi-MIR166a,csi-MIR166e,csi-MIR166b,csi-MIR166d,ctr-MIR166,ptc-MIR166a,ptc-MIR166i,ptc-MIR166l,ptc-MIR166b,ptc-MIR166h,ptc-MIR166m,ptc-MIR166j,ptc-MIR166g,ptc-MIR166e,ptc-MIR166c,ptc-MIR166q,ptc-MIR166n,ptc-MIR166o,nta-MIR166d,nta-MIR166b,nta-MIR166f,nta-MIR166c,nta-MIR166a,nta-…	mdm-MIR166b	gttgtggggaatgctgtctggttcgagaccattcctctgaaacaaagaacatgaacatrgaatgatcTCGGACCAGGCTTCATTCCCCccaac	mdm-miR166a	TCGGACCAGGCTTCATTCCCC	6426	3970	388.5	3581.5	2903045	298289	2604756	2792629	298289	2494340	0	y	((.((((((...((((..(((((....(((((.((((((((..(((((((((((((.((..(((...(((((.((..............)))).)))..)))..)).))))))))))).)).)))))))).)))))......))))))))))))))))).	3	1
34	5'	47	TGAAGCTGCCAGCATGATCTGG	mdm-miR167b_R+1_1ss21AG	gp2a	scf0513174	+	509827	510088	5'	caagggaaaaagTGAAGCTGCCAGCATGATCTAGctttggttatcatgtagatcaagttcgaatctgctaataacccTAGCTAGGTCATGCTCTGACAGCctcactcct	442	273	1375	674	405	363	1328	570	52	mdm-miR167b_R+1_1ss21AG	TGAAGCTGCCAGCATGATCTGG	22	1942	822	783	1	gp2a	91	mdm-MIR167e,mdm-MIR167b,mdm-MIR167a,mdm-MIR167j,ccl-MIR167b,ccl-MIR167a,csi-MIR167b,csi-MIR167a,csi-MIR167c,ptc-MIR167b,ptc-MIR167d,ptc-MIR167f,ptc-MIR167g,ptc-MIR167e,nta-MIR167a,nta-MIR167c,nta-MIR167b,vvi-MIR167d,vvi-MIR167a,tcc-MIR167b,tcc-MIR167c,ghr-MIR167a,dpr-MIR167b,dpr-MIR167c,mtr-MIR167a,mtr-MIR167b,lja-MIR167,gso-MIR167a,gma-MIR167b,gma-MIR167d,gma-MIR167a,gma-MIR167c,gma-MIR167e,gma-…	mdm-MIR167b	gggaaaaagTGAAGCTGCCAGCATGATCTAgctttggctaaagatgtatataatcacgtatatatgtatcagttctattaaccctggctaggtcatgctctgacagcttcactccttcct	mdm-miR167b	TGAAGCTGCCAGCATGATCTA	2767	2763	751	2012	2272118	621681	1650437	2193869	621681	1572188	0	y	...((((....((((.((((.(((((((((((((((..((((((...(((((((......).))))))..))))))..))))))))))))))..).)))).))))))))	2	2
35	5'	48	TGAGCCAAGAATGACTTGCTG	csi-miR169_L+1R-1_1ss20CT	gp2a	scf0513163	-	2029671	2029931	5'	agtgtcttgcatgaaggggtagggaatggagtTGAGCCAAGAATGACTTGCTGcaagtgaaatacgtattcgtcgaccgatctgagatctcgatctcgatctcggtcatgaaactatgcagcaagttgttcttgtctctatttggttctctatcttctcatgtcagacgta	203	260	274	232	186	347	265	196	60	csi-miR169_L+1R-1_1ss20CT	TGAGCCAAGAATGACTTGCTG	21	952	783	783	0	gp2a	25	csi-MIR169,ptc-MIR169t,ptc-MIR169n,vvi-MIR169o,vvi-MIR169m,vvi-MIR169p,vvi-MIR169l,tcc-MIR169m,tcc-MIR169n,gma-MIR169h,gma-MIR169p,gma-MIR169j,gma-MIR169e,gma-MIR169d,rco-MIR169c,cme-MIR169r,cme-MIR169t,ath-MIR169f,ath-MIR169e,ath-MIR169d,ath-MIR169g,aly-MIR169g,aly-MIR169f,aly-MIR169e,aly-MIR169d,	csi-MIR169	atcaagtgctaccttatatacagaatagaaagaataacaaaggttggaaattggtctagggtttcttatatgaagggataaatagaggatctaGAGCCAAGAATGACTTGCCGAcggcattgaccataatatcatacggcaggccattcttgtctcaactccgctctctatcttctcatctgagactctcggacactgacaaccaacctcagcaatgcagcaccagatgattctttctattctcaggtgatctatgatactatgctcatctaatgagctctgcgtcacatttttatttttcccccatttttctgacttctcctccttgagccatttttccagatccatgaacagtacaaaatctctattacaaccaacagagttaagcaatgctgttct…	csi-miR169	GAGCCAAGAATGACTTGCCGA	969	968.5	960.5	8	757921	751836	6085	757771	751836	5935	0	y	...((((..(((((..(((((((((((..(((.(((.((((((..(((((((((((((..........(((((.((((((..((((((....))))))...)))))))))))))).))))))))))..)))))).))).)))..)))))))))))..)))))..))))...	4	0
36	5'	49	AAGCCAAGGATGAATTGCCGG	mdm-miR169a_2ss1CA14CA	gp2a	scf0513163	+	2054915	2055175	5'	ttccctaaagcattgcatgggaaagaagagagtacaatcAAGCCAAGGATGAATTGCCGGcgcggcgtcatatacatatataggccttcaaacgccgtatgttatatgtttgtcggcggtcggcaatccattcttggccatgttggtctctttttgtttcatgcaatgccatgaggaat	443	578	427	444	406	771	412	376	137	mdm-miR169a_2ss1CA14CA	AAGCCAAGGATGAATTGCCGG	21	1459	780	780	0	gp2a	70	mdm-MIR169a,ptc-MIR169h,ptc-MIR169g,ptc-MIR169f,ptc-MIR169e,ptc-MIR169d,ptc-MIR169p,ptc-MIR169s,ptc-MIR169o,nta-MIR169r,nta-MIR169q,nta-MIR169s,sly-MIR169a,vvi-MIR169v,vvi-MIR169c,vvi-MIR169a,vvi-MIR169k,vvi-MIR169m,vvi-MIR169n,vvi-MIR169j,vvi-MIR169p,vvi-MIR169q,vvi-MIR169s,vvi-MIR169w,aqc-MIR169c,tcc-MIR169b,tcc-MIR169m,tcc-MIR169k,tcc-MIR169l,vun-MIR169,mtr-MIR169d,mtr-MIR169g,mtr-MIR169j,mtr-…	mdm-MIR169a	aagtctcagagtgtttgcatcaagcagaagagatcggaatgCAGCCAAGGATGACTTGCCGGcttttacagtatcttgctctaatcagcagagtcttgccggcaagttgctcttggctacatttagctctcttcctctaatgtcagcctctgagattt	mdm-miR169a	CAGCCAAGGATGACTTGCCGG	1892	1892	1771	121	1464714	1371634	93080	1460751	1371634	89117	0	y	...(((...((((((((((..(..((((((((..((((...((((((((((.(((((((((((((((.((((((.((((((.(((........)))))))))))))))..)))).)).))))))))).))))))))))...))))..)))))))).)..))))))))))....)))...	2	0
37	5'	50	TGAGCCAAGGATGACTTGCCT	mdm-miR169c_L+1R-1_2ss2TG21CT	gp2a	scf0513163	-	2053446	2053706	5'	catgtccagagagtcttgcatgaagaggcatagagtagaaaTGAGCCAAGGATGACTTGCCTgatacacattgcttggggataaaatgttcagACAAGTCGTCCTTGGttcaccattgctctcttttctctcatgccagattctcaaggactaa	12	6	16	14	11	8	15	11	116	mdm-miR169c_L+1R-1_2ss2TG21CT	TGAGCCAAGGATGACTTGCCT	21	24	775	775	0	gp2a	133	mdm-MIR169f,mdm-MIR169e,mdm-MIR169c,mdm-MIR169a,ptc-MIR169i,ptc-MIR169m,ptc-MIR169k,ptc-MIR169o,ptc-MIR169n,ptc-MIR169j,ptc-MIR169l,ptc-MIR169h,ptc-MIR169e,ptc-MIR169d,ptc-MIR169g,ptc-MIR169f,ptc-MIR169p,ptc-MIR169s,nta-MIR169r,nta-MIR169q,nta-MIR169s,sly-MIR169b,sly-MIR169a,vvi-MIR169e,vvi-MIR169o,vvi-MIR169l,vvi-MIR169m,vvi-MIR169p,vvi-MIR169n,vvi-MIR169q,vvi-MIR169c,vvi-MIR169j,vvi-MIR169s,vvi…	mdm-MIR169c	gcaggaagctggaggccttacatgaagaaaagagcgttgtttggTAGCCAAGGATGACTTGCCCGcctccgatttcatgaaagaatatatggcattatttaattgtctgtctaaaatttatattcatgtttggaatccaggcagtctccttggctaatctcacaggctcttttctttcatgctaggccctcctcttcttc	mdm-miR169c	TAGCCAAGGATGACTTGCCCG	49	47.5	46	1.5	35777	34704	1073	35726.5	34704	1022.5	0	y	...((((.((((((((.(((((.(((((...(((((((...((((((((((((((((((.((((...(((((............))))))))).))))))))))))))))))...)))))))....)))))))))).))))))))..))))...	2	0
38	5'	51	TGAGCCAGGAATGACTTGCCGGC	ptc-miR169t_L+1R+1_1ss8AG	gp2a	scf0513163	+	2031020	2031282	5'	tttgatgatgaatgtagtttgtgtagtcttccatggagagaaaaagagtagagacaTGAGCCAGGAATGACTTGCCGGCcgcgggcacatgagccgttgccggtatagtctttcctgagctcttgtttgctctctttctcgtcatgcaagacgctggaaactaacatcatccgg	202	324	230	202	185	432	222	171	113	ptc-miR169t_L+1R+1_1ss8AG	TGAGCCAGGAATGACTTGCCGGC	23	880	871	871	0	gp2a	6	ptc-MIR169t,gma-MIR169j,gma-MIR169l,gma-MIR169k,cme-MIR169r,cme-MIR169t,	ptc-MIR169t	ctagagtccGAGCCAAGAATGACTTGCCGGcaggctagcatttgctagctacagggcaagatgtatgctaaagtgacattccgccaggttgttcttggctctactttg	ptc-miR169t	GAGCCAAGAATGACTTGCCGG	958	958	913	45	830881	793794	37087	830750	793794	36956	0	y	...(((((((....((((((.....(((((.((((..((((((.((((((..((((.((((((((((.(((((((((((..(((.(......))))..))))))).)))).)))))).)))).)))))))))).))))))..)))).))))).....)))))).)))))))...	2	1
39	5'	52	AGATATTGGTGCGGTTCAATC	gma-miR171q-5p	gp2a	scf0513171	-	514615	514875	5'	aacatgAGATATTGGTGCGGTTCAATCagaaaccagctctttgctcttaaagttctgttatttgaTTGAGCCGTGCCAATATCACATata	123	97	85	129	113	129	82	109	92	gma-miR171c-5p	AGATATTGGTGCGGTTCAATC	21	311	770	770	0	gp2a	50	ptc-MIR171b,ptc-MIR171g,ptc-MIR171h,ptc-MIR171i,ptc-MIR171f,nta-MIR171a,nta-MIR171c,sly-MIR171b,sly-MIR171c,sly-MIR171a,vvi-MIR171h,aqc-MIR171a,aqc-MIR171d,tcc-MIR171d,tcc-MIR171h,ssl-MIR171a,mtr-MIR171f,mtr-MIR171d,mtr-MIR171c,gma-MIR171u,gma-MIR171e,gma-MIR171c,gma-MIR171q,gma-MIR171j,rco-MIR171b,rco-MIR171f,rco-MIR171d,cme-MIR171f,bol-MIR171a,ath-MIR171c,aly-MIR171c,smo-MIR171a,bdi-MIR171c,bdi…	gma-MIR171q	tgagaacttgAGATATTGGTGCGGTTCAATCagaaggcagtgttttatgatccaaaaactctgtgttatttgaTTGAGCCGTGCCAATATCACAtgtaattcatctcgg	gma-miR171c-5p	AGATATTGGTGCGGTTCAATC	453	434	422	12	333868	324991	8877	333537	324991	8546	0	y	...(((.((((((((..(((((((((((((...(((..(((((....)))))..)))...)))))))))))))..)))))))).)))...	4	0
40	3'	53	TTTTTCTGATTGAGCCGTGCC	zma-MIR171e-p3_1ss2GT	gp2a	scf0513134	-	571279	571539	3'	attgcacttaacgaacttcgggggcacttgaaatagttaCTGCGATGTTGGCCCGGTTCActcaggagaaagaaacatatagctcatcaatgaaggcttactgtgTTTTTCTGATTGAGCCGTGCCaatatctcagtgctctttcttccgtctctccacgttatctgcgat	61	16	58	58	56	21	56	49	122	zma-MIR171e-p3_1ss2GT	TTTTTCTGATTGAGCCGTGCC	21	176	770	770	0	gp2a	34	mdm-MIR171c,ptc-MIR171f,ptc-MIR171i,ptc-MIR171e,ptc-MIR171g,ptc-MIR171h,nta-MIR171c,sly-MIR171a,vvi-MIR171a,vvi-MIR171i,aqc-MIR171a,aqc-MIR171d,aqc-MIR171b,tcc-MIR171h,tcc-MIR171g,mtr-MIR171d,mtr-MIR171c,mtr-MIR171a,gma-MIR171j,rco-MIR171f,rco-MIR171d,rco-MIR171c,rco-MIR171e,cme-MIR171f,cme-MIR171d,bdi-MIR171d,hvu-MIR171,osa-MIR171d,osa-MIR171e,sbi-MIR171i,sbi-MIR171d,tae-MIR171a,zma-MIR171d,zma-…	zma-MIR171e	agaaatggaatagtagctatgaTGTTGGCTCGGCTCACTCAGAcgacgtacgcgcgcgagatcatgtgctatgccgctgctgtttcTGATTGAGCCGTGCCAATATCttagtactcttccatgcat	zma-MIR171e-p3	tgtttcTGATTGAGCCGTGCC	200	192.5	179.5	13	148850	138220	10630.5	148390	138220	10170	0	y	((((((..(((((......((((((....((((.((.(((((.(((((((((.(((((((.(((((((((....(((...((((((....)))..)))...))).))))))))).))))))).))))))))).))))))).))))....))))))...)))))..))))))	2	0
41	3'	54	TGAATCTGGATGATGCTGCA	sbi-MIR172e-p3_1ss8TG	gp2a	scf0513008	-	493255	493514	3'	tgatGCAGCATCATCAAGATTCTCaactcggatcatcatgacatctcaaagattcaaatgaggatgtcagtaataaaacctgTGAATCTGGATGATGCTGCAccc	8	3	7	14	7	4	7	12	123	sbi-MIR172e-p3_1ss8TG	TGAATCTGGATGATGCTGCA	20	13	739	739	0	gp2a	20	mdm-MIR172l,mdm-MIR172d,mdm-MIR172i,ptc-MIR172a,ptc-MIR172c,vvi-MIR172a,vvi-MIR172b,vvi-MIR172d,gma-MIR172k,cme-MIR172f,bna-MIR172c,egu-MIR172b,egu-MIR172a,egu-MIR172c,egu-MIR172d,egu-MIR172f,egu-MIR172e,osa-MIR172c,sbi-MIR172e,sbi-MIR172a,	sbi-MIR172e	tcggagccgactctctgcaggtgcagcagcatcaaggttcgccagcagcaagcgatcgatcgaggcgtgtgtgtgTGAATCTTGATGATGCTGCACcagcaatgagccggccggc	sbi-MIR172e-p3	TGAATCTTGATGATGCTGCA	37	32	24	8	24737	18577	6160	24425	18577	5848	0	y	...((((((((((((.((((((.((....((.......((((((((((..........))).))))))).........)))).)))))).))))))))))))...	2	0
42	5'	55	TGCGAGTGTCTTCACCTCTGAA	gso-miR2109_R+1_1ss14GA	gp2a	scf0513034	+	74841	75102	5'	aagtgaggggtagtagggtttaaaggcggcgtgaaggctcTGCGAGTGTCTTCACCTCTGAAgcctctttctgaagaagctcctcttcttgtttggcttcagggcgaatacactctcagacactacacgctcgccatctttatccaactctctcagat	804	592	1099	1779	737	790	1061	1505	53	gso-miR2109_R+1_1ss14GA	TGCGAGTGTCTTCACCTCTGAA	22	3622	813	813	0	gp2a	3	mtr-MIR2678,gso-MIR2109,gma-MIR2109,	gso-MIR2109	agccagtgaaatcggTGCGAGTGTCTTCGCCTCTGAgagagatactatgagatctcaagcctcggaggcgtagatactcacacctctttttctggct	gso-miR2109	TGCGAGTGTCTTCGCCTCTGA	4274	4274	3926	348	3448790	3162969	285821	3436627	3162969	273658	0	y	...((((((..(((.((((.....(((((((((.((..((((.((((((.(((.((.((((((((.......(((((......)))))......)))))))))).))).)))))).))))..)).))))).))))......)))).)))))))))...	2	1
43	5'	56	TAATCTGCATCCTGAGGTTT	mdm-miR2111a_R-1	gp2a	scf0513177	-	1619547	1619806	5'	tacagctgttcttcattatgttgatattattgcgtcaggatcgggTAATCTGCATCCTGAGGTTTagatctgctcatatgtttgttgtatctaGCCCTTGGGATGCGGATTACCttgtcctcactggcaatgcaatacttgtcaagaatcatgaagctaaactacttga	29	12	24	22	26	15	23	18	134	mdm-miR2111a_R-1	TAATCTGCATCCTGAGGTTT	20	54	736	736	0	gp2a	44	mdm-MIR2111b,mdm-MIR2111a,ptc-MIR2111a,ptc-MIR2111b,vvi-MIR2111,tcc-MIR2111,mtr-MIR2111d,mtr-MIR2111e,mtr-MIR2111a,mtr-MIR2111l,mtr-MIR2111n,mtr-MIR2111o,mtr-MIR2111v,mtr-MIR2111j,mtr-MIR2111s,mtr-MIR2111k,mtr-MIR2111u,mtr-MIR2111f,mtr-MIR2111p,mtr-MIR2111b,mtr-MIR2111i,mtr-MIR2111c,mtr-MIR2111h,mtr-MIR2111m,mtr-MIR2111q,mtr-MIR2111r,lja-MIR2111,gma-MIR2111a,gma-MIR2111b,gma-MIR2111e,gma-MIR2111d…	mdm-MIR2111a	ggttaggattgggTAATCTGCATCCTGAGGTTTAgatcagcacacacgtatttgttgtatctagtccttgggatgcagattaccttgtccttgcc	mdm-miR2111a	TAATCTGCATCCTGAGGTTTA	147	85	46	39	62652	33942	28710	61319	33942	27377	0	y	...((..(((((((((.((.((((((.((((((((((((((..((((((((((((((..(((..(((((..((.((......))..)))))))..)))..))))))))))))))..)))))....)))...))))))..))))))..)).))))))...)))..))...	4	0
44	5'	57	CGGGTAATCTGCATCCTGAGG	aly-MIR2111a-p5	gp2a	scf0513173	+	1930860	1931120	5'	tcattgatattgggtaaggatCGGGTAATCTGCATCCTGAGGtttagagatcaattactctgtgttgtttctagctctcaggttgcagattacctcgtgctcaccgcaatgcaagac	30	21	33	33	27	27	31	28	55	aly-MIR2111a-p5	CGGGTAATCTGCATCCTGAGG	21	58	780	780	0	gp2a	44	mdm-MIR2111b,mdm-MIR2111a,ptc-MIR2111a,ptc-MIR2111b,vvi-MIR2111,tcc-MIR2111,mtr-MIR2111j,mtr-MIR2111s,mtr-MIR2111k,mtr-MIR2111d,mtr-MIR2111u,mtr-MIR2111f,mtr-MIR2111e,mtr-MIR2111a,mtr-MIR2111p,mtr-MIR2111b,mtr-MIR2111l,mtr-MIR2111i,mtr-MIR2111c,mtr-MIR2111n,mtr-MIR2111h,mtr-MIR2111o,mtr-MIR2111m,mtr-MIR2111v,mtr-MIR2111q,mtr-MIR2111r,lja-MIR2111,gma-MIR2111b,gma-MIR2111e,gma-MIR2111d,gma-MIR2111c…	aly-MIR2111a	gtattggtgaggatcgggTAATCTGCATCCTGAGGTTTAaagcttaatttaagcagaaaatttgtatacgcatatacgtatgtgtgttggtatagcttttaGTCCTCGGGATGCGGATTACCtcttccttacttacaatac	aly-MIR2111a-p5	cgggTAATCTGCATCCTGAGG	160	115	115	0	87070	87070	0	87070	87070	0	0	y	((.(((.((((((((.((.((..(((((((((((.((((((..(((((((.((((........)))))))))))..)))))).)))))))))))..)).)).))).)))))))))).	2	0
45	3'	58	TTTCCCATGCCACCCATTTCTA	hbr-MIR2118-p3_1ss1GT	gp2a	scf0513170	+	1636995	1637256	3'	tgaaatgggagaaaggtctcccaaaggctaatggagatgggtggttgggaaagaattccttctcaattctcctcatcttctacatgagaattaagaaggtggtaaaatatatgagtttctTTTCCCATGCCACCCATTTCTAttgtctttgggtgcctctccttcttcttc	16	8	22	20	15	11	21	17	51	hbr-MIR2118-p3_1ss1GT	TTTCCCATGCCACCCATTTCTA	22	64	815	815	0	gp2a	1	hbr-MIR2118,	hbr-MIR2118	ctgatatggaatgggagaatgagcctcccagaggcgagtgGAAATGGGTGGATGGGAGTGAacttaaaccagtctgtgattgaggtcgttcccatgccacccatttctattgtttctgggggtttctccctttcccatcg	hbr-MIR2118-p3	gttcccatgccacccatttcta	66	66	66	0	53717	53717	0	53717	53717	0	0	y	.(((..((((((..(((..(((((((((.((((((((((((((((((((((((((..((((((.(((((((..............))))))).)))))).................))).))))))).))))))))))))))))))))))))).)))))))))..)))...	1	1
46	5'	59	TGTCGCAGGAGAGATGGCACT	vvi-miR3627-5p_L-1_1ss16CT	gp2a	scf0512983	+	254859	255119	5'	atccTGTCGCAGGAGAGATGGCACTacctagctttacgcatacgtaccgagatatatacgtacgtggtaaatatatatagatgagctattgatggtgtagcagctagcttgtgccatcctcctgtgacagtaa	23	35	39	119	21	46	38	101	93	vvi-miR3627-5p_L-1_1ss16CT	TGTCGCAGGAGAGATGGCACT	21	259	774	774	0	gp2a	3	vvi-MIR3627,mtr-MIR5211,gma-MIR5786,	vvi-MIR3627	gaaggaaagcgagaaagaaagaggggttgggggtttcTTGTCGCAGGAGAGACGGCACTtgctcttgtgtagcaaattgcaagcggcaaTCGCCGCTCTCCTGTGACAAGatacccttcagcttctttcctacattcttcgccctac	vvi-miR3627-5p	TTGTCGCAGGAGAGACGGCACT	346	215.5	212.5	3	163055	160823	2232	163006	160823	2182.5	0	y	...((((((((((((.((((((((...((((((((((((.(((((((............)))))))..........((((.....)))).....)))))).))))))...))))))))))))))))))))...	1	1
47	5'	60	TGTCGCAGGAGAGATGGCACT	vvi-miR3627-5p_L-1_1ss16CT	gp2a	scf0512983	+	258558	258818	5'	ccTGTCGCAGGAGAGATGGCACTacctagctttacgcatacgtaacgagatatatacgtacgtggtaaatatatatagatgagttattgatggtgtagcagctagcttgtgccatcctcctgtgacnnn	23	35	39	119	21	46	38	101	93	vvi-miR3627-5p_L-1_1ss16CT	TGTCGCAGGAGAGATGGCACT		259	774	774	0	gp2a	2	vvi-MIR3627,gma-MIR5786,	vvi-MIR3627	gaaggaaagcgagaaagaaagaggggttgggggtttcTTGTCGCAGGAGAGACGGCACTtgctcttgtgtagcaaattgcaagcggcaaTCGCCGCTCTCCTGTGACAAGatacccttcagcttctttcctacattcttcgccctac	vvi-miR3627-5p	TTGTCGCAGGAGAGACGGCACT	265	134.5	133.5	1	103742	103085	657	103710	103085	625.5	0	y	...((((((((((.((((((((...((((((((((((....(((((...(((((((..(((...)))..)))))))......))))).....)))))).))))))...))))))))))))))))))...	1	1
48	5'	61	AAGCTCAGGAGGGATAGCGCC	mdm-miR390a	gp2a	scf0513177	+	2959414	2959674	5'	gctagtatggaagaatctgtaAAGCTCAGGAGGGATAGCGCCatttatgccttgcttggattacttgcttagtcatatatagCGCTATCCATCCTGGGTTTCCtgggttcttcttactttg	246	116	188	168	225	155	182	142	70	mdm-miR390a	AAGCTCAGGAGGGATAGCGCC	21	658	778	778	0	gp2a	53	mdm-MIR390e,mdm-MIR390c,mdm-MIR390d,mdm-MIR390b,mdm-MIR390a,csi-MIR390,ptc-MIR390a,ptc-MIR390b,ptc-MIR390d,ptc-MIR390c,nta-MIR390b,nta-MIR390c,nta-MIR390a,vvi-MIR390,tcc-MIR390a,tcc-MIR390b,ghr-MIR390a,ghr-MIR390b,ghr-MIR390c,mtr-MIR390,gma-MIR390g,gma-MIR390a,gma-MIR390f,gma-MIR390e,gma-MIR390c,gma-MIR390d,gma-MIR390b,rco-MIR390a,rco-MIR390b,cme-MIR390d,cme-MIR390c,cme-MIR390a,cme-MIR390b,bna-MI…	mdm-MIR390a	agtaagggagaatctgtaAAGCTCAGGAGGGATAGCGCCatatgaacaaagggtctatttactaggtgggcgtttctttgttcatcatgcgctatccatcctgagtttcatggcttcttcatact	mdm-miR390a	AAGCTCAGGAGGGATAGCGCC	732	718	694	24	556917	538945	17972	556279	538945	17334	0	y	...((((.((((((((((...((((((((((.(((((((((.((.((((.((.((..((....)).))..)).)))).)).))))))))).))))))))))...))))))))))))))...	2	0
49	3'	62	CTGAAGTGTTTGGGGGAACTC	mdm-miR395a	gp2a	scf0513158	+	3267483	3267743	3'	acctggaGTTCTCCTGAATACTTCATTGgggtagctagtatcatgcttcaagagtcaagatccttaatttagtcacaatttaagggtgactagctcatcaagtattttagttttatcccaCTGAAGTGTTTGGGGGAACTCtgggtgcc	268	238	354	859	245	317	342	727	146	mdm-miR395a	CTGAAGTGTTTGGGGGAACTC	21	1188	776	776	0	gp2a	144	mdm-MIR395b,mdm-MIR395d,mdm-MIR395g,mdm-MIR395i,mdm-MIR395c,mdm-MIR395h,mdm-MIR395a,csi-MIR395,ptc-MIR395c,ptc-MIR395k,ptc-MIR395f,ptc-MIR395g,ptc-MIR395i,ptc-MIR395e,ptc-MIR395b,ptc-MIR395d,ptc-MIR395j,nta-MIR395a,nta-MIR395c,nta-MIR395b,sly-MIR395b,sly-MIR395a,vvi-MIR395c,vvi-MIR395a,vvi-MIR395i,vvi-MIR395k,vvi-MIR395h,vvi-MIR395m,vvi-MIR395d,vvi-MIR395f,vvi-MIR395b,vvi-MIR395l,vvi-MIR395j,vvi-…	mdm-MIR395a	cctagagttcccccgaatacttcattaggatcgatacataaattctttgaaggattgcaccgtctctaCTGAAGTGTTTGGGGGAACTCcggg	mdm-miR395a	CTGAAGTGTTTGGGGGAACTC	1739	1718.5	1714.5	4	1.27483e+06	1.27198e+06	2851	1.27474e+06	1.27198e+06	2764	0	y	(((..(((((((((..(((((((((.((((((((((((....((((((...((((....((((((((.((......)).)))))))).....))))...)))))).)))))..))))))).)))))))))..)))))))))..)))...	4	0
50	5'	63	ATTGAGTGCAGCGTTGATGAA	mdm-miR397a_L+1R-1	gp2a	scf0513104	+	1427674	1427934	5'	gtccagaaggaatagaaacataATTGGGTGCAGCGTTGATGAAattgcctccagctcgcctccatgaagatcatcggaactcggaaacgaaactaaggacTTCATCAACGCTGCACTCAATgacgtttcttcattctgaaa	102	71	119	126	93	95	114	106	147	mdm-miR397a_L+1R-1	ATTGAGTGCAGCGTTGATGAA	21	821	776	740	1	gp2a	13	mdm-MIR397b,mdm-MIR397a,csi-MIR397,ptc-MIR397a,ptc-MIR397b,vvi-MIR397a,tcc-MIR397,gma-MIR397b,gma-MIR397a,rco-MIR397,bdi-MIR397a,osa-MIR397b,osa-MIR397a,	mdm-MIR397a	agaaacatcaTTGAGTGCAGCGTTGATGAAAgtccgtattccttwcgaatcttcattaggcatcggaaactttcgtcagctgtgcacccaattatgtttct	mdm-miR397a	TTGAGTGCAGCGTTGATGAAA	836	417	0	417	323723	0	323723	308708	0	308708	0	y	...(((((.((..((((((...(((((((((((((((((((((....(((..........((((((.....))).)))..(((....))).....)))..)))))))))))))))))))))...)))))))).)))))...	0	0
51	3'	64	CATCAATGCTGCACCCAATTA	mdm-MIR397b-p3_1ss7CT	gp2a	scf0513104	-	1427752	1428012	3'	gcaccggaggtttcagaatgaagaaacgtcATTGAGTGCAGCGTTGATGAAgtccttagtttcgtttccgagttccgatgatcttcatggaggcgagctggaggcaatttCATCAACGCTGCACCCAATTAtgtttctattccttctggaca	28	8	26	28	26	11	25	24	65	mdm-MIR397b-p3_1ss7CT	CATCAATGCTGCACCCAATTA	21	36	796	759	1	gp2a	28	mdm-MIR397a,mdm-MIR397b,csi-MIR397,ptc-MIR397a,ptc-MIR397b,nta-MIR397,sly-MIR397,vvi-MIR397a,tcc-MIR397,ssl-MIR397,dpr-MIR397,gma-MIR397a,gma-MIR397b,rco-MIR397,cme-MIR397,bna-MIR397a,bna-MIR397b,ath-MIR397a,aly-MIR397a,aly-MIR397b,pab-MIR397,bdi-MIR397a,hvu-MIR397,osa-MIR397a,osa-MIR397b,sbi-MIR397,zma-MIR397a,zma-MIR397b,	mdm-MIR397b	ccagattgaagaaacatcaTTGAGTGCAGCGTTGATGAAAgttcgtattgcttctgaatcttcattaggacatcgaaacatttcatcaacgctgcacccaattatgtttctatccattttgg	mdm-MIR397b-p3	catcaacgctgcacccaatta	2055	90	32	58	70379	24496	45883	68213	24496	43717	0	y	...(((((((.....((((..((((((((.((((.((((((((((((((((((((((((((.((..((((((.((....)).)))...)))..)))))).))))..)))))))))))))))))).)))).)))))))))))))))))))...	2	0
52	3'	65	AGCCAAAGGAGAATTGCCCTG	mdm-miR399a_1ss1TA	gp2a	scf0513082	+	809541	809801	3'	gatgaataacagggtaattctcccttggcagaaatgtattatggtgcatttacgtaactgttaaatggcactgttttcAGCCAAAGGAGAATTGCCCTGaaattcaaa	10	22	15	12	9	29	14	10	29	mdm-miR399a_1ss1TA	AGCCAAAGGAGAATTGCCCTG	21	37	778	778	0	gp2a	64	mdm-MIR399c,mdm-MIR399b,mdm-MIR399a,mdm-MIR399d,mdm-MIR399i,mdm-MIR399j,csi-MIR399c,csi-MIR399e,csi-MIR399d,csi-MIR399b,ptc-MIR399f,ptc-MIR399g,ptc-MIR399l,ptc-MIR399i,sly-MIR399,vvi-MIR399a,vvi-MIR399h,vvi-MIR399c,vvi-MIR399b,vvi-MIR399i,aqc-MIR399,tcc-MIR399g,tcc-MIR399e,tcc-MIR399i,tcc-MIR399a,ssl-MIR399,vun-MIR399b,vun-MIR399a,pvu-MIR399a,mtr-MIR399l,gma-MIR399h,gma-MIR399b,gma-MIR399a,gma-MI…	mdm-MIR399a	tgaataacagtgcaattctcctttggcagaagtcattctggtgcatatactcttgagtactatcgctggatgcatatatatgctttcTGCCAAAGGAGAATTGCCCTGcaattca	mdm-miR399a	TGCCAAAGGAGAATTGCCCTG	60	58.5	50	8.5	43918.5	37610	6308.5	43651	37610	6041	0	y	..(((((..((((((((((((((.(((((.((((......(..(((((((((((....)).))))).))))..))))).))))).))))))))))))))..)))))..	2	0
53	3'	66	TGCCAAAGGAGATTTGCTCGG	mdm-miR399e	gp2a	scf0513082	-	813299	813559	3'	ctaattgcaggtgaattcctgagcgacctcctattggcagattgtctatctacctacacaaaatcaatgttagaaaagctgggtagctaggcaatcTGCCAAAGGAGATTTGCTCAGaaattctactgcagtata	40	126	67	38	37	168	65	32	38	mdm-miR399e	TGCCAAAGGAGATTTGCTCGG	21	519	779	740	1	gp2a	20	mdm-MIR399g,mdm-MIR399e,ptc-MIR399k,ptc-MIR399j,mtr-MIR399e,mtr-MIR399g,mtr-MIR399a,mtr-MIR399f,gma-MIR399d,gma-MIR399g,gma-MIR399e,gma-MIR399f,rco-MIR399f,rco-MIR399e,bna-MIR399c,osa-MIR399f,osa-MIR399e,osa-MIR399g,sbi-MIR399e,sbi-MIR399f,	mdm-MIR399e	cagggcaaagtctcttctggcatgtagccacttacaaattacaaattcttaattctggctgagcaagctggccagccttgcattacttttgtagtgtgctttaTGCCAAAGGAGATTTGCTCGG	mdm-miR399e	TGCCAAAGGAGATTTGCTCGG	538	270.5	3	267.5	210566	2487	208078	200118	2487	197630	0	y	...(((((((..(((((.((((((((.(((((.(((((((((((((((.(((((((.......((.......)).....))))))).))))))))))))))))))))..)))))))).)))))..)))))))...	3	1
54	3'	66	TGCCAAAGGAGATTTGCTCGG	mdm-miR399e	gp2a	scf0513082	-	815567	815827	3'	acagggcaagttctcctctggcatgtagccactgacagttagaaatgcttctgcttgttgatcatgcatgacagcattgcattatcttcttgtagtgtgttcaaTGCCAAAGGAGATTTGCTCGGca	40	126	67	38	37	168	65	32	38	mdm-miR399e	TGCCAAAGGAGATTTGCTCGG		519	779	779	0	gp2a	33	mdm-MIR399g,mdm-MIR399e,csi-MIR399a,ptc-MIR399k,ptc-MIR399b,vvi-MIR399e,tcc-MIR399d,tcc-MIR399b,mtr-MIR399f,mtr-MIR399e,mtr-MIR399g,mtr-MIR399a,gma-MIR399d,gma-MIR399g,gma-MIR399e,gma-MIR399f,rco-MIR399f,rco-MIR399b,rco-MIR399e,cme-MIR399c,bna-MIR399a,bna-MIR399b,ath-MIR399f,aly-MIR399h,aly-MIR399a,aly-MIR399j,osa-MIR399g,osa-MIR399f,osa-MIR399e,sbi-MIR399e,sbi-MIR399f,sbi-MIR399k,zma-MIR399g,	mdm-MIR399e	cagggcaaagtctcttctggcatgtagccacttacaaattacaaattcttaattctggctgagcaagctggccagccttgcattacttttgtagtgtgctttaTGCCAAAGGAGATTTGCTCGG	mdm-miR399e	TGCCAAAGGAGATTTGCTCGG	548	280.5	267	13.5	218194	207761	10433.5	217848	207761	10087	0	y	...((((((((.(((((.((((((..((((((((.(((..((((((((...((((.(((..........)))))))..))))).)))..)))))))).)))..)))))).)))))))))))))....	2	1
55	3'	67	TGCCAAAGGAGAGTTGCCCTG	mdm-miR399i	gp2a	scf0513098	-	819898	820158	3'	atataagcgaattagttgtagggcgtctttcctttggcaggcaatggtggttttgtttcgatggatttcacgttgtaattggttgttgattatgatcTGCCAAAGGAGAGTTGCCCTGcaactgcttttgcttaatg	181	183	261	206	166	244	252	174	138	mdm-miR399i	TGCCAAAGGAGAGTTGCCCTG	21	627	773	773	0	gp2a	69	mdm-MIR399j,mdm-MIR399i,mdm-MIR399c,mdm-MIR399d,mdm-MIR399b,mdm-MIR399a,csi-MIR399d,csi-MIR399b,csi-MIR399c,csi-MIR399e,ptc-MIR399h,ptc-MIR399f,ptc-MIR399l,ptc-MIR399i,ptc-MIR399g,sly-MIR399,vvi-MIR399c,vvi-MIR399b,vvi-MIR399a,vvi-MIR399h,vvi-MIR399i,aqc-MIR399,tcc-MIR399i,tcc-MIR399g,tcc-MIR399a,ghr-MIR399c,vun-MIR399a,vun-MIR399b,pvu-MIR399a,mtr-MIR399l,mtr-MIR399b,mtr-MIR399o,gma-MIR399b,gma-M…	mdm-MIR399i	taagcaaatcagtcatagggctcctccctcttggcaggcactggtgaatgatgcaactacaatcactttcattgactTGCCAAAGGAGAGTTGCCCTGcgattgctttagctta	mdm-miR399i	TGCCAAAGGAGAGTTGCCCTG	832	830.5	800.5	30	638484	616658	21825	637634	616658	20975.5	0	y	...((((((((.((((((((((((..((((((((((((((......((((.((..(....)..))..)))).(..((((..(...)..))))..).))))))))))))))..))))))))))))..))))))))...	4	0
56	5'	68	ACTCTCCCTCAAGGGCTTCTC	mdm-miR477_1ss14AG	gp2a	scf0513098	+	2538407	2538667	5'	tacaaggcattggttgatcACTCTCCCTCAAGGGCTTCTCgccaaggtgaagtattatatcctaggtcgtccccttcttaattctaagggagacttggggtacttacacaaggttgtggagcctgcgagggggaatgaccaagcttcttgccttaac	227	194	225	306	208	259	217	259	62	mdm-miR477_1ss14AG	ACTCTCCCTCAAGGGCTTCTC	21	327	778	778	0	gp2a	11	mdm-MIR477,mdm-MIR447,csi-MIR477b,csi-MIR473,nta-MIR477b,nta-MIR477a,vvi-MIR447b,aqc-MIR477e,aqc-MIR477b,aqc-MIR477a,gma-MIR5036,	mdm-MIR477	ACTCTCCCTCAAGAGCTTCTCagcttaaggcaatatgttataccaagatccttagtttgagggggatatttggtatattttaggctgtggagctcgagggggaga	mdm-miR477	ACTCTCCCTCAAGAGCTTCTC	952	952	523	429	748179	402432	345747	730515	402432	328083	0	y	...((((((..((((..(((.((((((((..(((((((.((((...(((((((((.....((((((((.((((..............)))))))))))))))))).)))..))).).)))))))..)))))))).)))...))))...))))))...	4	0
57	5'	69	TGACGATGAGAGAGAGCACGC	mdm-miR535d_1ss7CT	gp2a	scf0513164	+	1158902	1159162	5'	gcagggcatctgtgattggatatgttTGACGATGAGAGAGAGCACGCttgtcagcatctatgaaacagtcatgcgtgtttacgtgcgtgctccctcttctcatcatacaatcgagctaatcttgtgcaccttt	30627	13410	21594	27761	28072	17885	20850	23491	115	mdm-miR535d_1ss7CT	TGACGATGAGAGAGAGCACGC	21	92258	777	777	0	gp2a	15	mdm-MIR535d,mdm-MIR535a,mdm-MIR535b,mdm-MIR535c,csi-MIR535,vvi-MIR535a,vvi-MIR535c,aqc-MIR535,rco-MIR535,ppt-MIR535c,ppt-MIR535d,ppt-MIR535a,ppt-MIR535b,pab-MIR535,osa-MIR535,	mdm-MIR535d	gatgttgtgTGACGACGAGAGAGAGCACGCttgtcatcacccatgaaaggatcatggttgtttacgggcgtgctctttcttgttgtcataaagtc	mdm-miR535d	TGACGACGAGAGAGAGCACGC	93392	93392	93307	85	72563393	72501126	62267	72561603	72501126	60477	0	y	..(((((((....((((((...(((.(((.((..((((.((((((((..((.((((..(((((.....)))))..)))).))..)))))))).))))..)).))).)))......))))))..)))).)))..	4	0
58	3'	70	TGAACTTATTGCAACTAGCTT	mdm-miR7125_1ss1CT	gp2a	scf0513173	-	819243	819503	3'	tcccaggttctcaaattcaagccagttgcaataggttcaatccttagggctactgccttcataagcatTGAACTTATTGCAACTAGCTTtgatttttgagtttgatt	65	49	108	103	60	65	104	87	90	mdm-miR7125_1ss1CT	TGAACTTATTGCAACTAGCTT	21	271	788	788	0	gp2a	1	mdm-MIR7125,	mdm-MIR7125	aaagctctcaaatgcaagctagttgtaataagttcaatctttttatggccagtagtgccctaaataagcatCGAACTTATTGCAACTAGCTTtaatttttgagtttt	mdm-miR7125	CGAACTTATTGCAACTAGCTT	325	325	280	45	255392	220189	35203	254012	220189	33823	0	y	...((..(((..((((..((((.((((((((((((((((((.((((((((....))))...)))).)))))))))))))))))).))))..))))..)))..))...	2	0
59	3'	71	TTAGATGACCATCAACAAACA	csi-miR827	gp2a	scf0513151	-	657968	658228	3'	aTATGTTTGTTTATGGTCATCtagttatattccatctgcttcatttggttatcatgaTTAGATGACCATCAACAAACAcat	41	20	44	106	38	27	42	90	76	csi-miR827	TTAGATGACCATCAACAAACA	21	199	789	789	0	gp2a	7	csi-MIR827,tcc-MIR827,ghr-MIR827a,ghr-MIR827c,ghr-MIR827b,ath-MIR827,aly-MIR827,	csi-MIR827	gcttgttgattgtcatctaatcattttctttttcatccgggcatttgaatgattatatggTTAGATGACCATCAACAAACAtattcatggtatggcatgc	csi-miR827	TTAGATGACCATCAACAAACA	212	211	202	9	166152	159261	6891	165824	159261	6563	0	y	...((((((((.((((((((((((((((...(((..((...))..))).....)))))))))))))))).))))))))...	2	0
60	3'	72	AGATACTCATTTGAGCAAGCA	aly-miR828-3p_R-1_1ss5GA	gp2a	scf0513190	+	1064147	1064407	3'	atatcctctttgtaatattTCTTGCTCAAATGAGTATTCCAgccgcgacagttgttttggctggtgcatgctggctagctactgctgcagatcaatctgAGATACTCATTTGAGCAAGCAacgttagaagcagaggaagt	13	14	23	66	12	19	22	55	44	aly-miR828-3p_R-1_1ss5GA	AGATACTCATTTGAGCAAGCA	21	57	779	779	0	gp2a	11	mdm-MIR828b,mdm-MIR828a,ptc-MIR828b,ptc-MIR828a,vvi-MIR828a,ssl-MIR828,gma-MIR828a,gma-MIR828b,cme-MIR828,ath-MIR828,aly-MIR828,	aly-MIR828	catggacaaagtcacaaaagtgataaaatctccttccactttctaatgttTCTTGCTTAAATGAGTATTCCAtgtaaaaaatgagtcactcactcatatgggtgggttgggttggttttctcttcatgAGATGCTCATTTGAGCAAGCAAtgtctgtgagtggaactatttagtatcatgttatgaattttgtcttttg	aly-miR828-3p	AGATGCTCATTTGAGCAAGCAA	134	115.5	113.5	2	91738	90082	1656	91664	90082	1582	0	y	...((((((((.(((..((.(((((((((((((((((((((((((..((....))..)))))))((((.(((((....)))..))))))...........)))))))))))))))))).))..))).))..))))))...	0	0
[truncated: 12 more columns]
